# Supplementary material for: A Comprehensive Overview of Innovative Approaches to Prevent Kidney Ischemia-Reperfusion Injury: Bibliometric and In Silico Analyses
Source: Preprints.org preprint supplement (doi:10.20944/preprints202304.1055.v1), 2023-04-27
Supplement: Supplementary file 1 [file supplementary]

A comprehensive overview of innovative approaches to prevent kidney ischemia-reperfusion injury: Bibliometric and in silico analyses

Myltykbay S. Rysmakhanov1,2,*,†, Afshin Zare3,†, Aibolat S. Smagulov1, Nurgul A. Abenova4, Nadiar M. Mussin1, Yerlan B. Sultangereyev1,2, Bazylbek S. Zhakiyev1, Gani K. Kuttymuratov2, Mehmet Haberal5, Nazanin Jafari3, Hanieh Baneshi3, Shabnam Bakhshalizadeh6,7, Mahdi Mahdipour8,9, Farhad Rahmanifar10, and Amin Tamadon2,11,*

1 Department of Surgery and Urology No2, West Kazakhstan Medical University, Aktobe, Kazakhstan. [mrtransplantolog@gmail.com](mailto:mrtransplantolog@gmail.com) (M.S.R.); [smagulov.aibolat@gmail.com](mailto:smagulov.aibolat@gmail.com) (A.S.S.); [nadiar_musin@zkmu.kz](mailto:nadiar_musin@zkmu.kz) (N.M.M.); [yerlan_sb@mail.ru](mailto:yerlan_sb@mail.ru) (Y.B.S.); [zhakiev1959@mail.ru](mailto:zhakiev1959@mail.ru) (B.S.Z.)

2 Department of Surgery and Transplantation, Aktobe Medical Center, Aktobe, Kazakhstan. [aiger2000@mail.ru](mailto:aiger2000@mail.ru) (G.K.K.);

3 PerciaVista R&D Co. Shiraz, Iran. [afshinzareresearch@gmail.com](mailto:afshinzareresearch@gmail.com) (A.Z.); [nazijaf960@gmail.com](mailto:nazijaf960@gmail.com) (N.J.); [hanie.baneshi@gmail.com](mailto:hanie.baneshi@gmail.com) (H.B.); [amintamaddon@yahoo.com](mailto:amintamaddon@yahoo.com) (A.T.)

4 Department of General Medical Practice No1, West Kazakhstan Medical University, Aktobe, Kazakhstan. [nurgul_abenova@mail.ru](mailto:nurgul_abenova@mail.ru) (N.A.A.)

5 Department of General Surgery, Division of Transplantation, Başkent University, Ankara, Turkey. [rectorate@baskent.edu.tr](mailto:rectorate@baskent.edu.tr) (M.H.)

6 Reproductive Development, Murdoch Children's Research Institute, Melbourne, Victoria, Australia. [bakhshalizadehshabnam@gmail.com](mailto:bakhshalizadehshabnam@gmail.com) (S.B.)

7 Department of Paediatrics, University of Melbourne, Melbourne, Victoria, Australia.

8 Stem Cell Research Center, Tabriz University of Medical Sciences, Tabriz, Iran. [mahdi.mahdipour@gmail.com](mailto:mahdi.mahdipour@gmail.com) (M.M.)

9 Department of Applied Cell Sciences, Faculty of Advanced Medical Sciences, Tabriz University of Medical Sciences, Tabriz, Iran

10 Department of Basic Sciences, School of Veterinary Medicine, Shiraz University, Shiraz, Iran. [f.rahmanifar@yahoo.com](mailto:f.rahmanifar@yahoo.com) (F.R.)

11 Department for Scientific Work, West Kazakhstan Marat Ospanov Medical University, Aktobe, Kazakhstan. amintamaddon@yahoo.com (A.T.)

† These authors have same contributions as the first author.

* Correspondences: [mrtransplantolog@gmail.com](mailto:mrtransplantolog@gmail.com) ; Tel: +7 77 7036 5690 (M.S.R.); [amintamaddon@yahoo.com](mailto:amintamaddon@yahoo.com); Tel/fax: +7 705 629 9350 (A.T.)


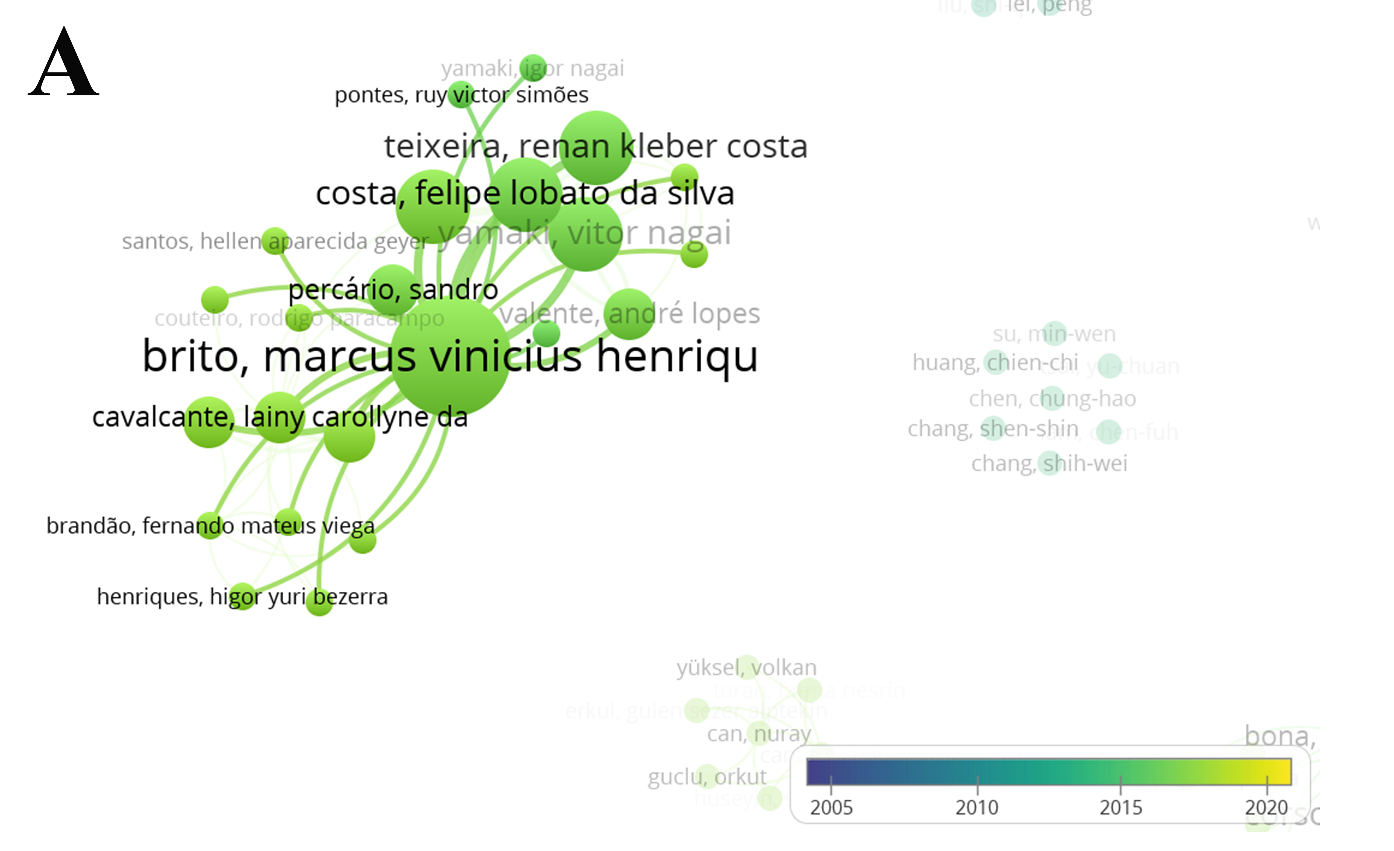


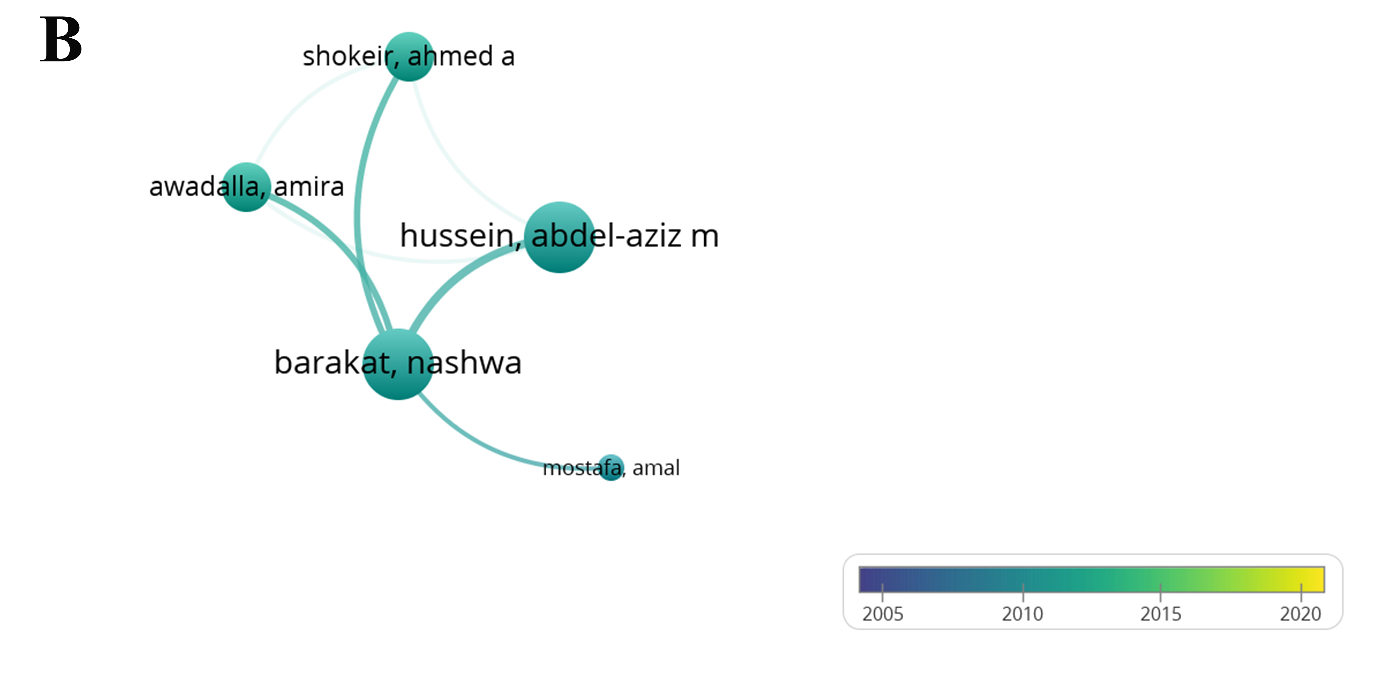


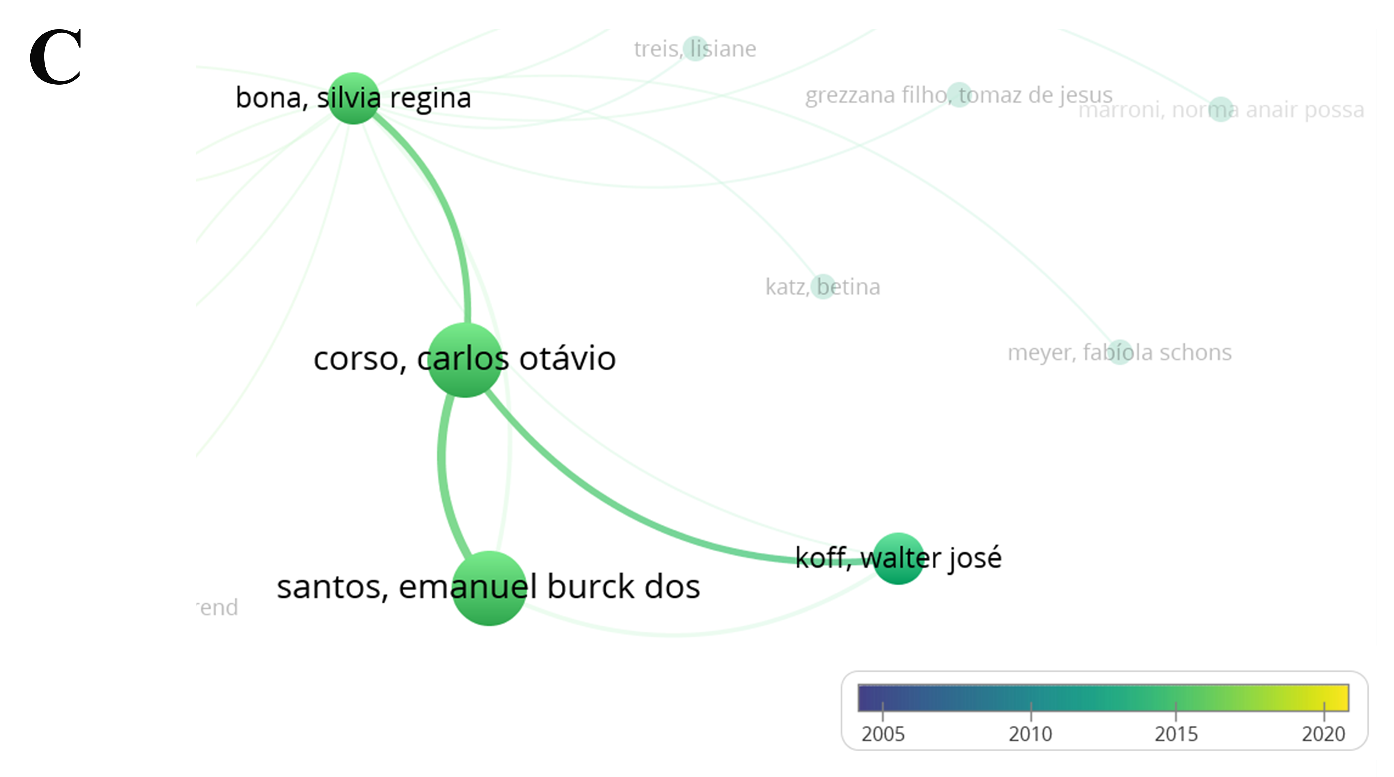


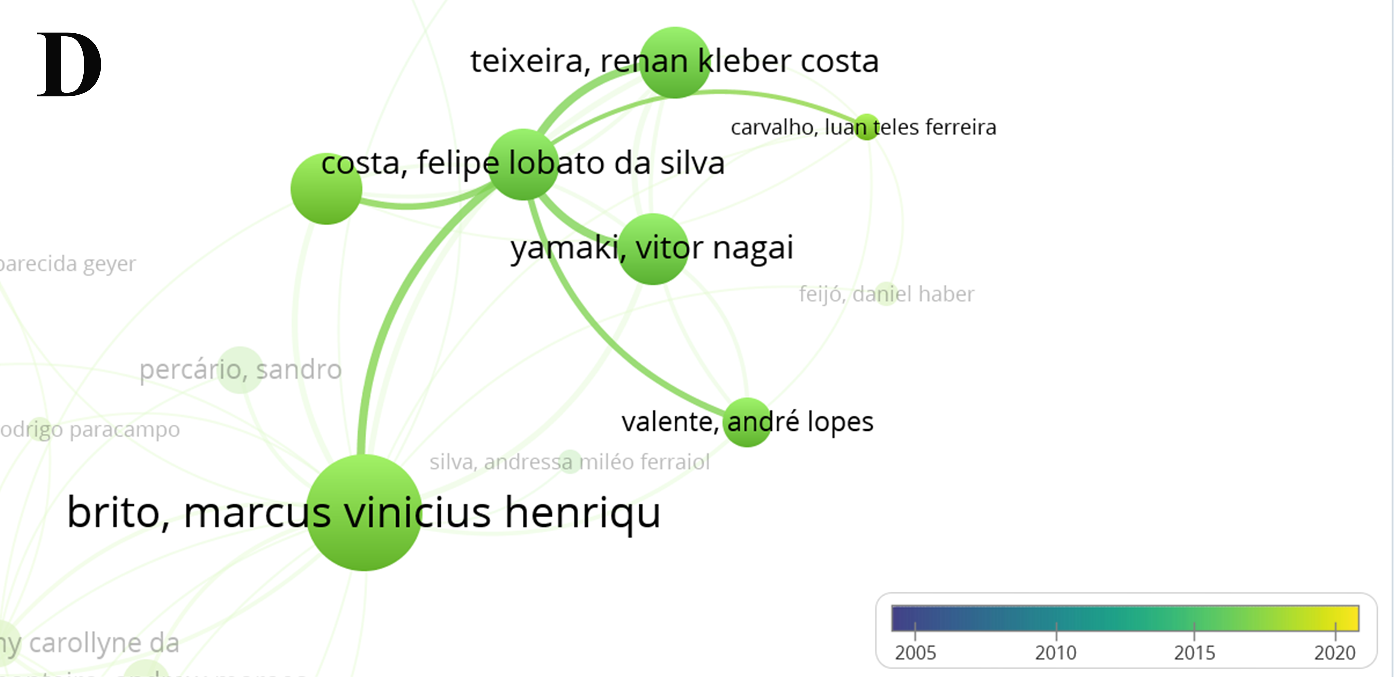


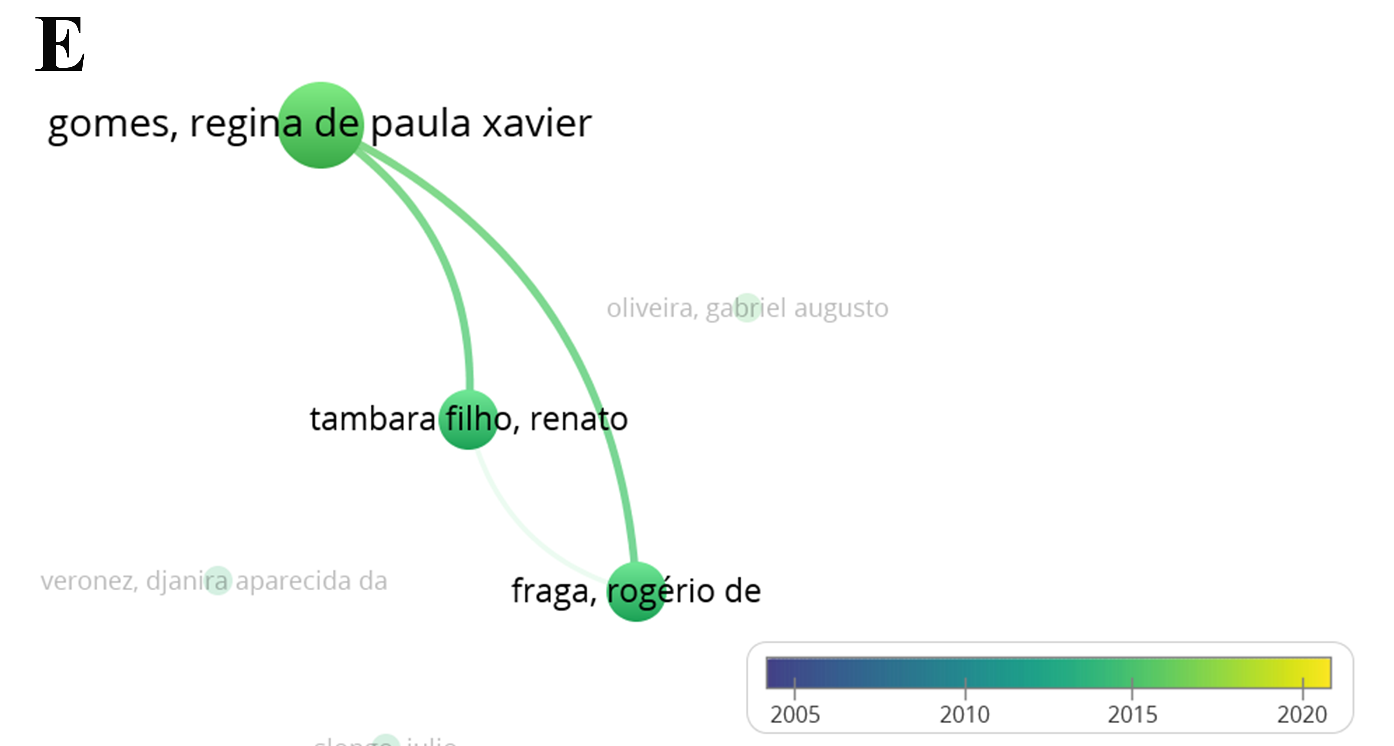


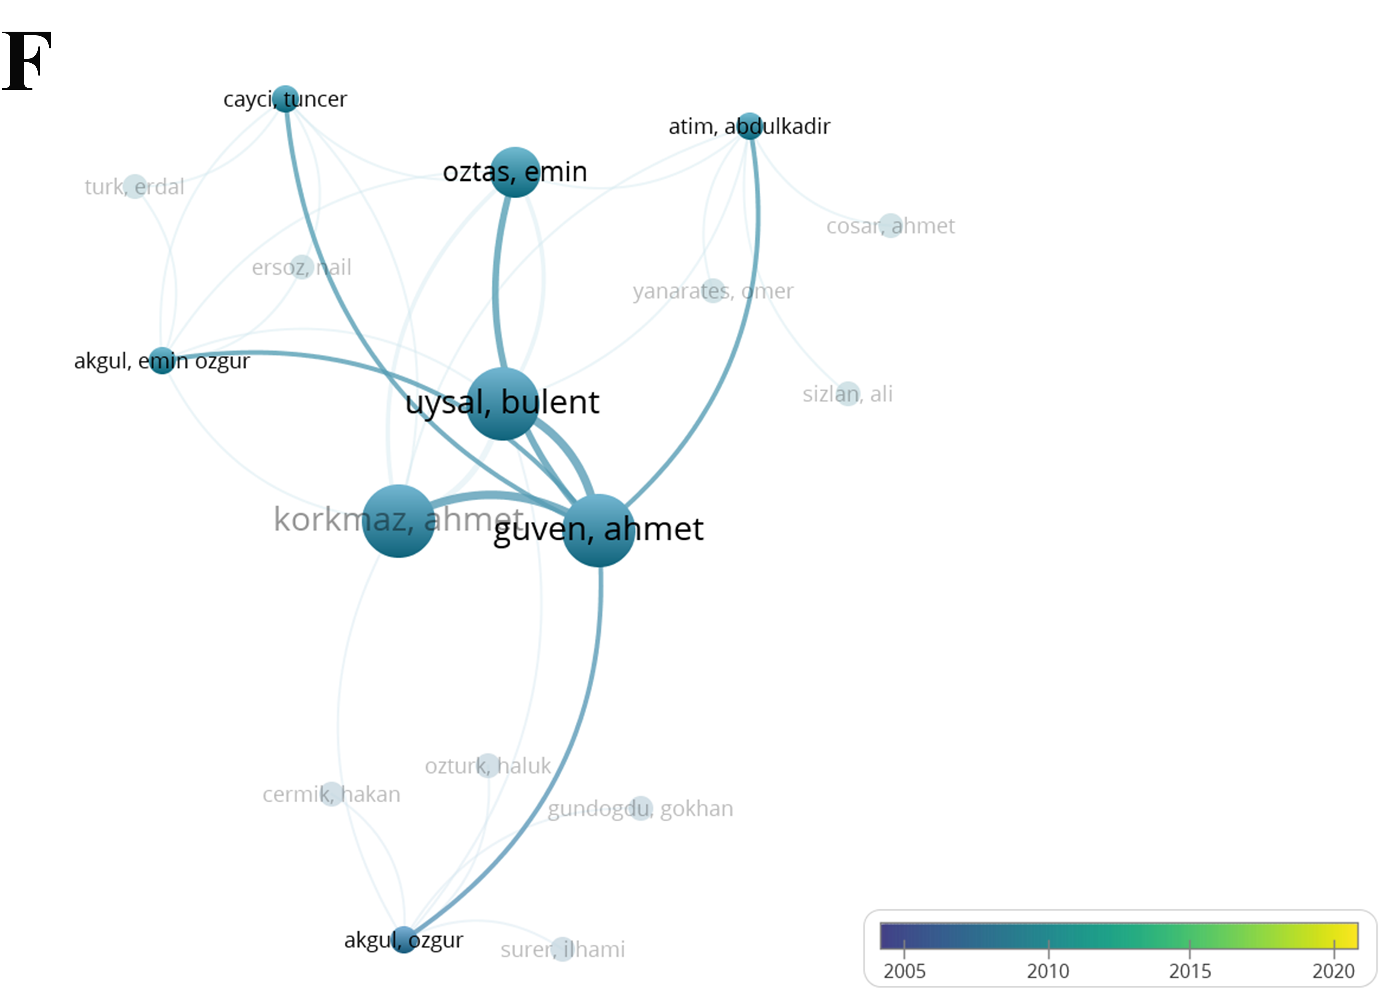


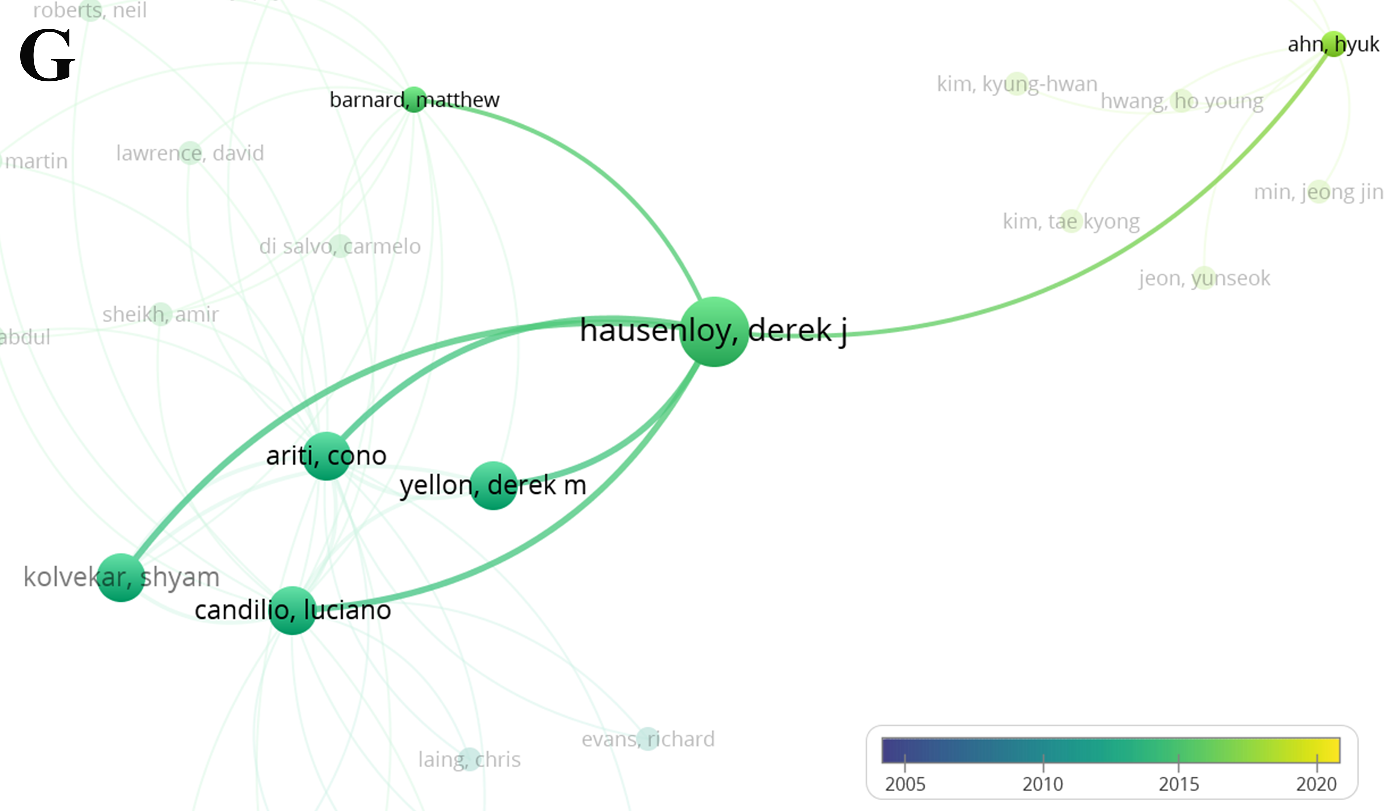


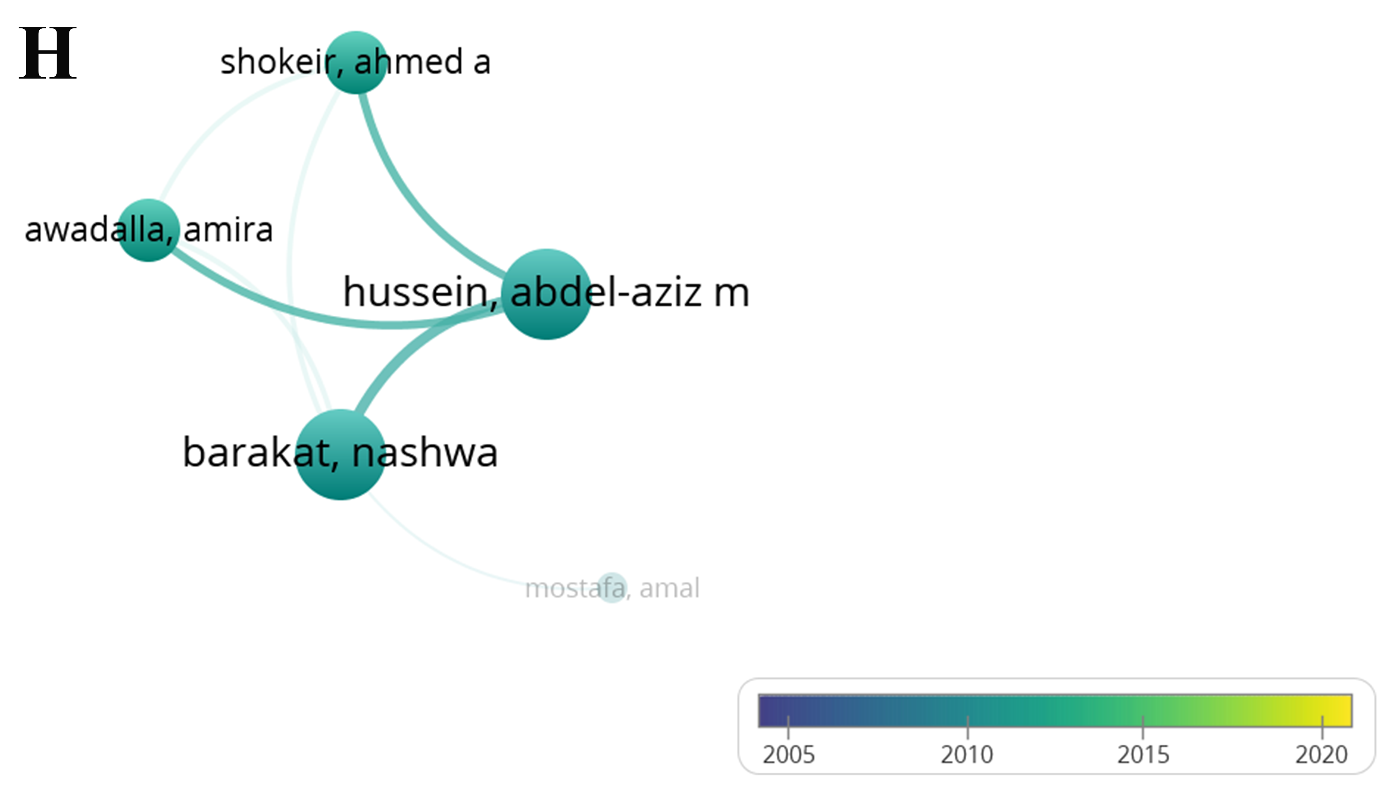


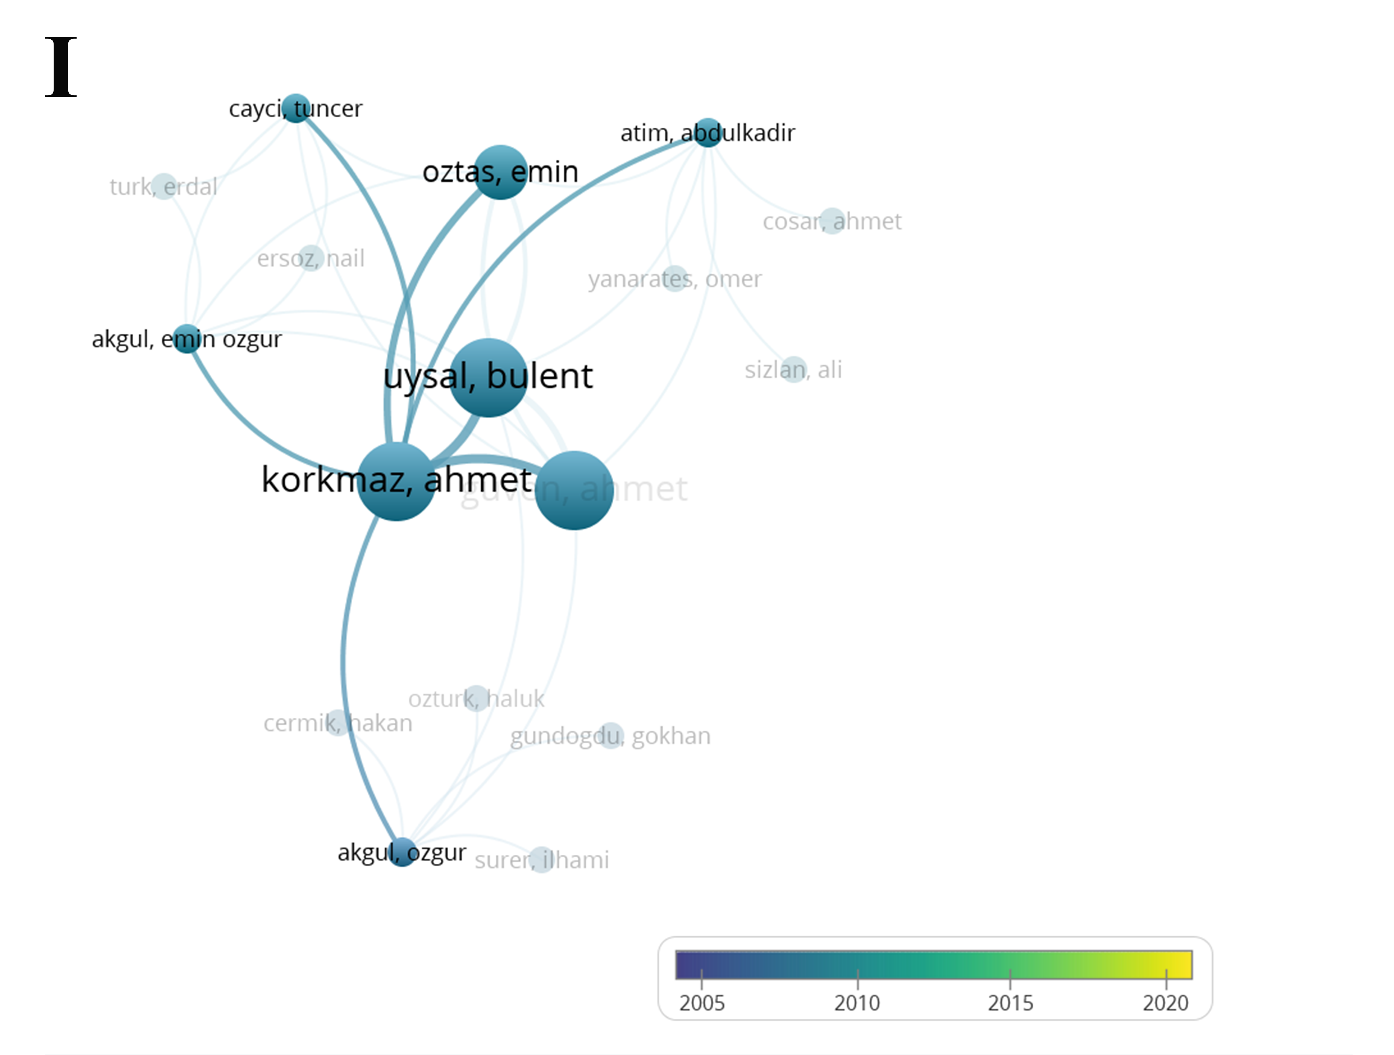


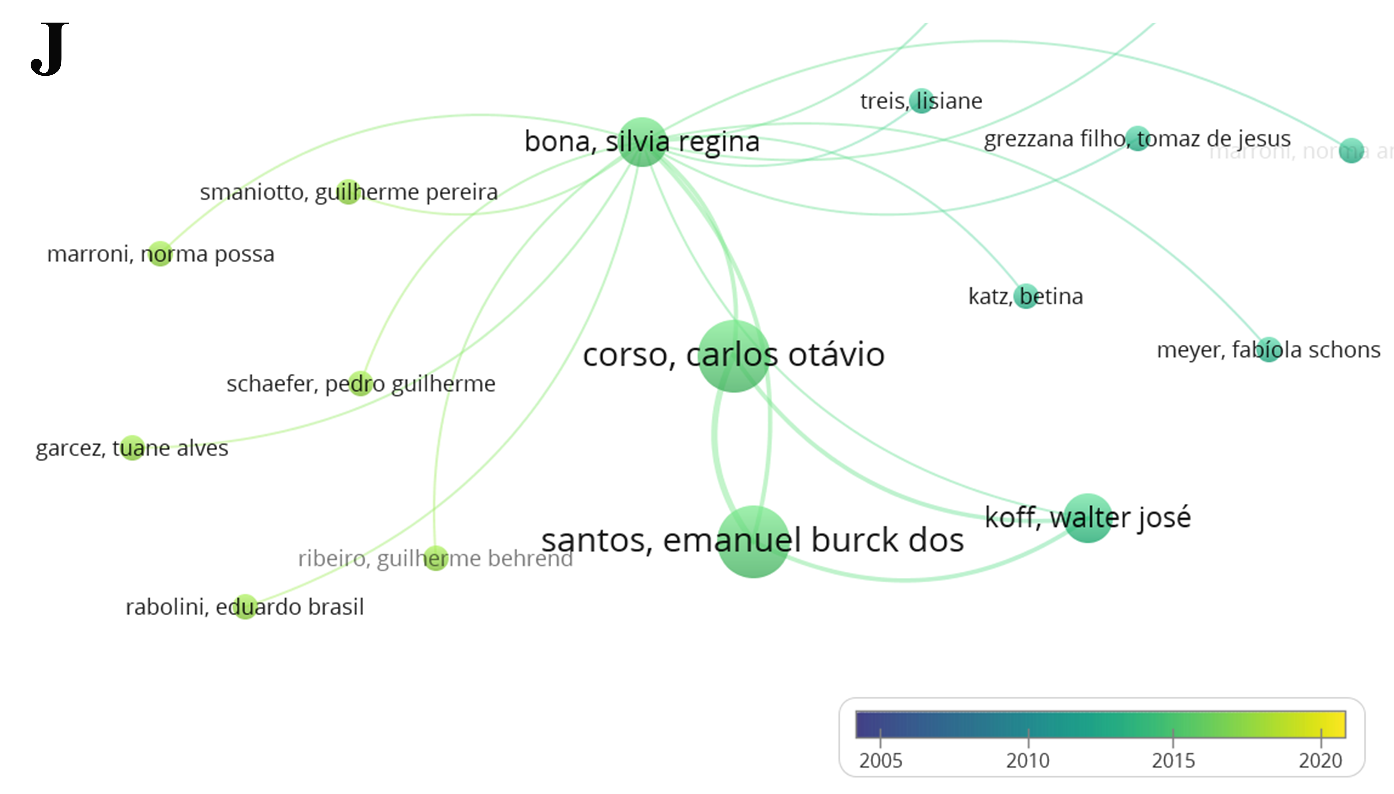


Figure S1. the average publication year of authors with the greatest number of published manuscripts and the condition of their connections with other authors. The average publication year of Brito, Marcus Vinicius Henriques (A), Barakat, Nashwa (B), Corso, Carlos Otávio (C), Costa, Felipe Lobato Da Silva (D), Gomes, Regina De Paula Xavier (E), Guven, Ahmet (F), Hausenloy, Derek J (G), Hussein, Abdel-Aziz M (H), Korkmaz, Ahmet (I), Santos, Emanuel Burck Dos (J) are displayed.


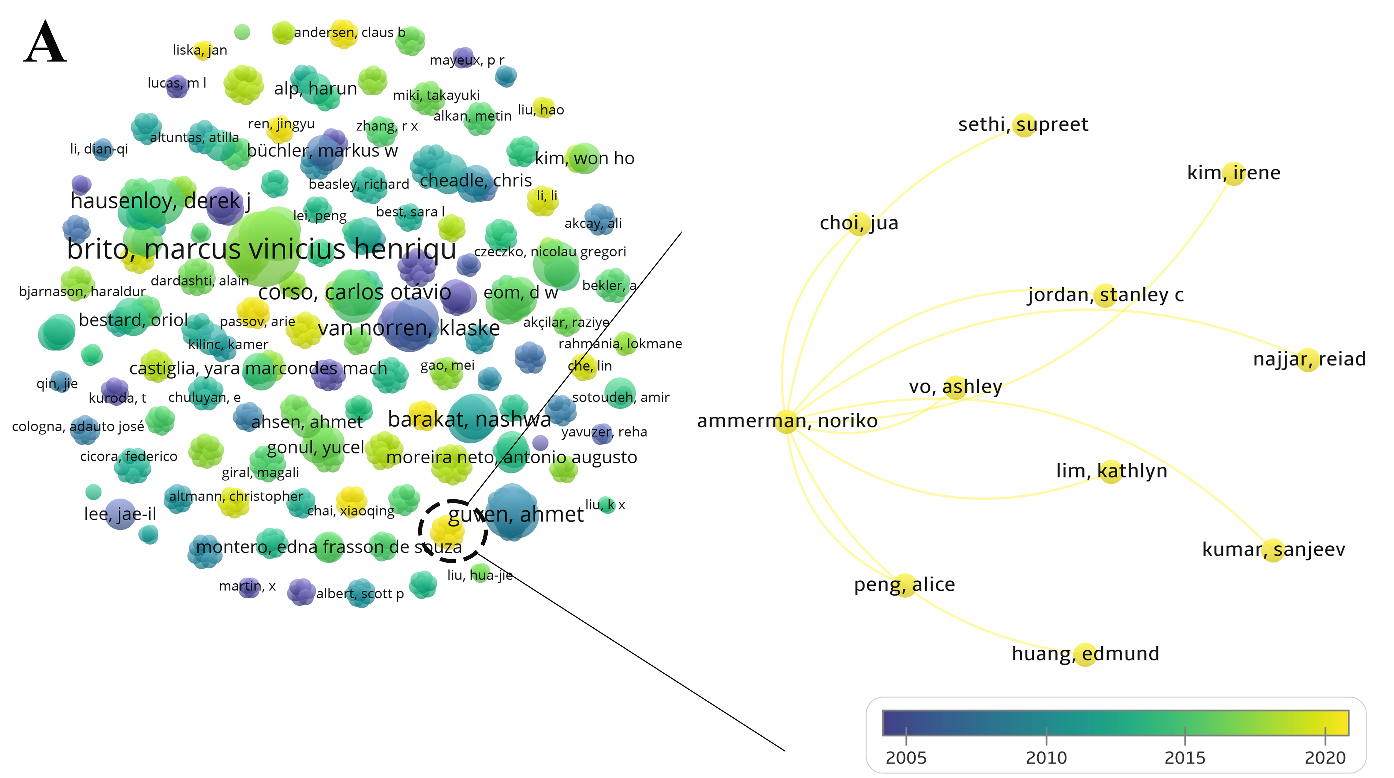


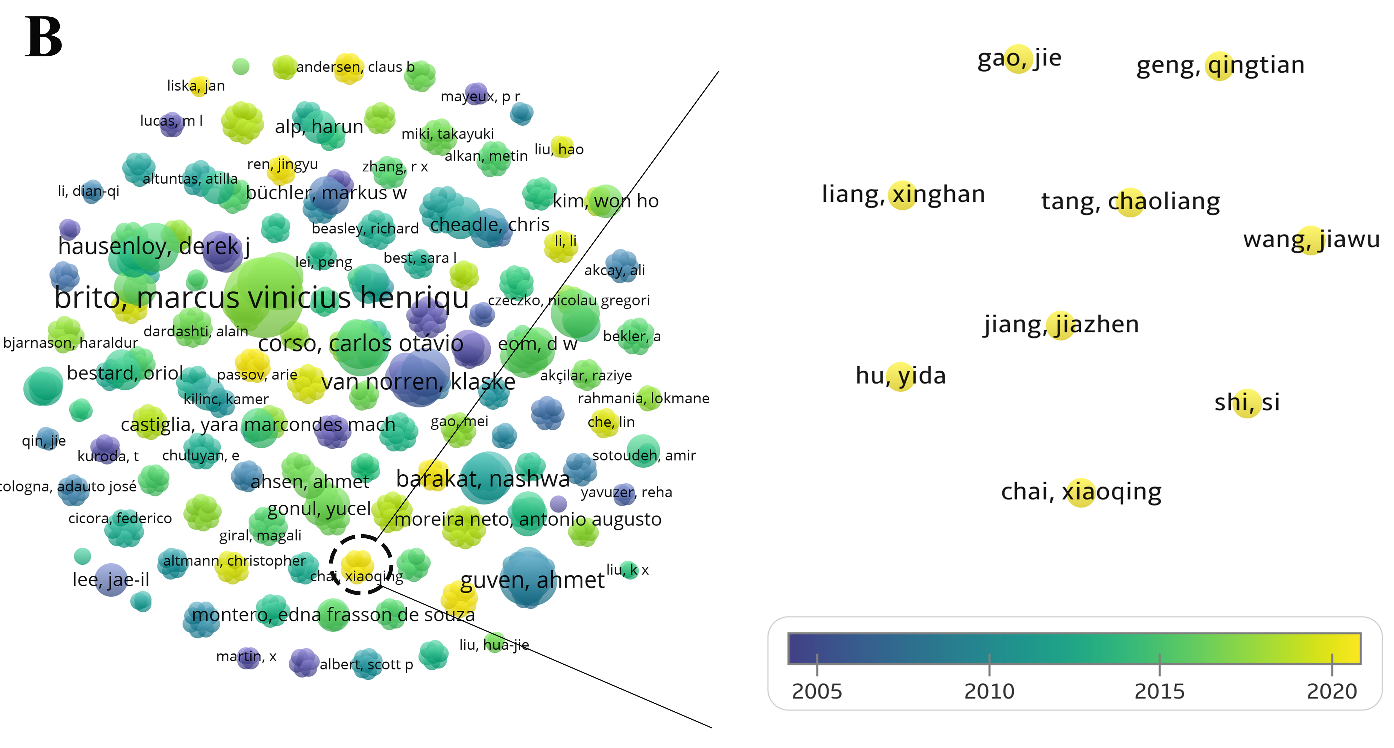


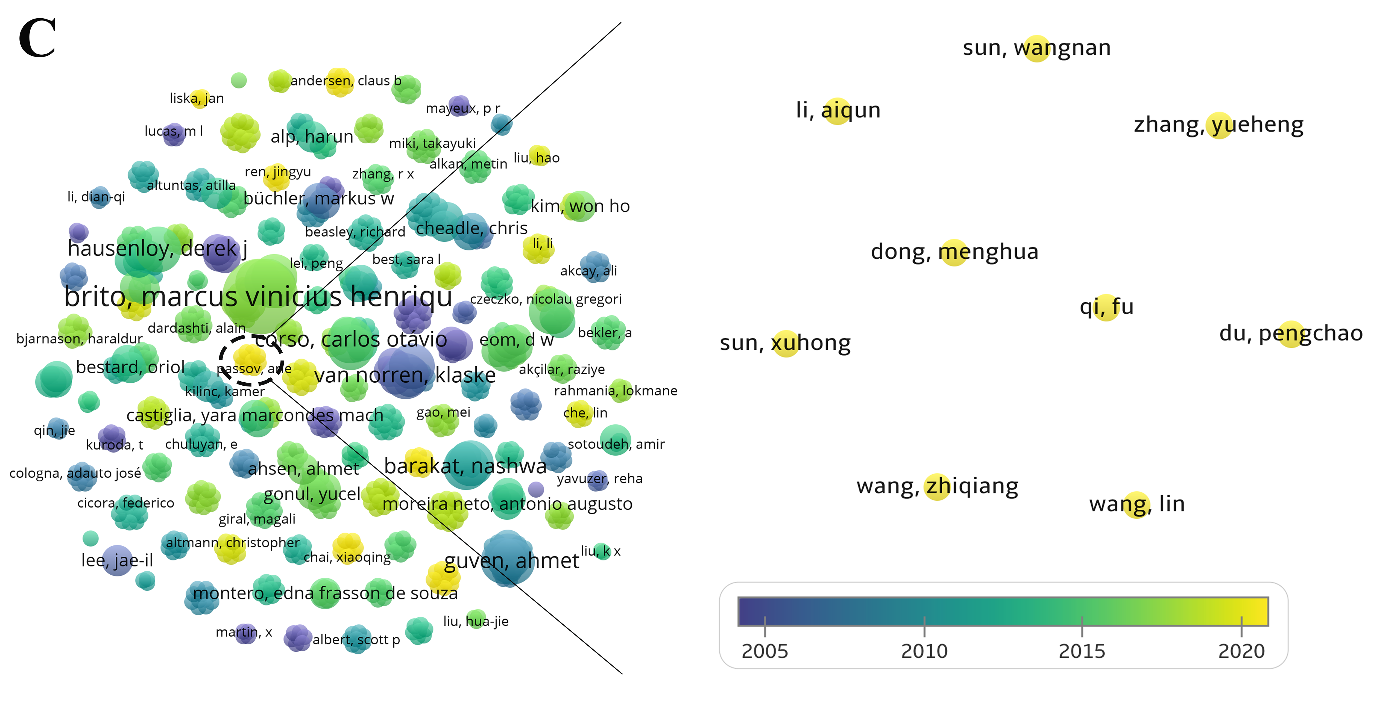


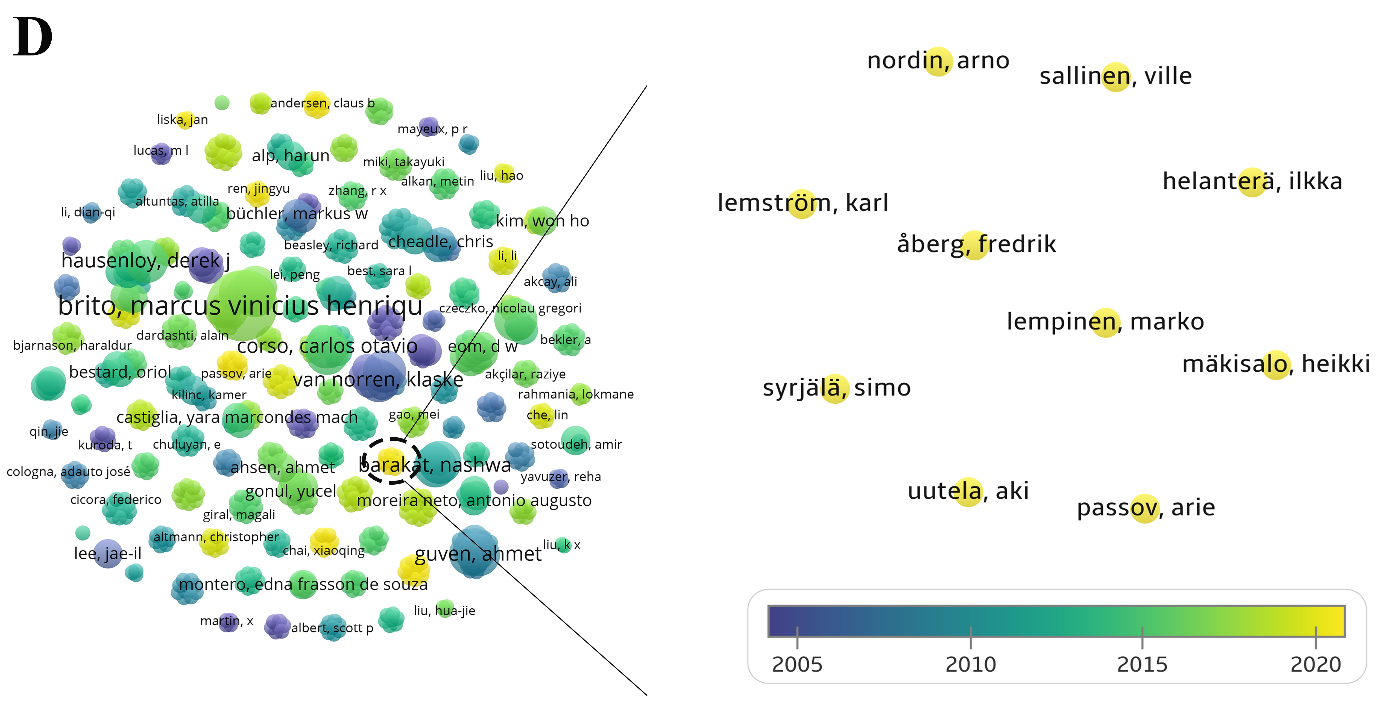


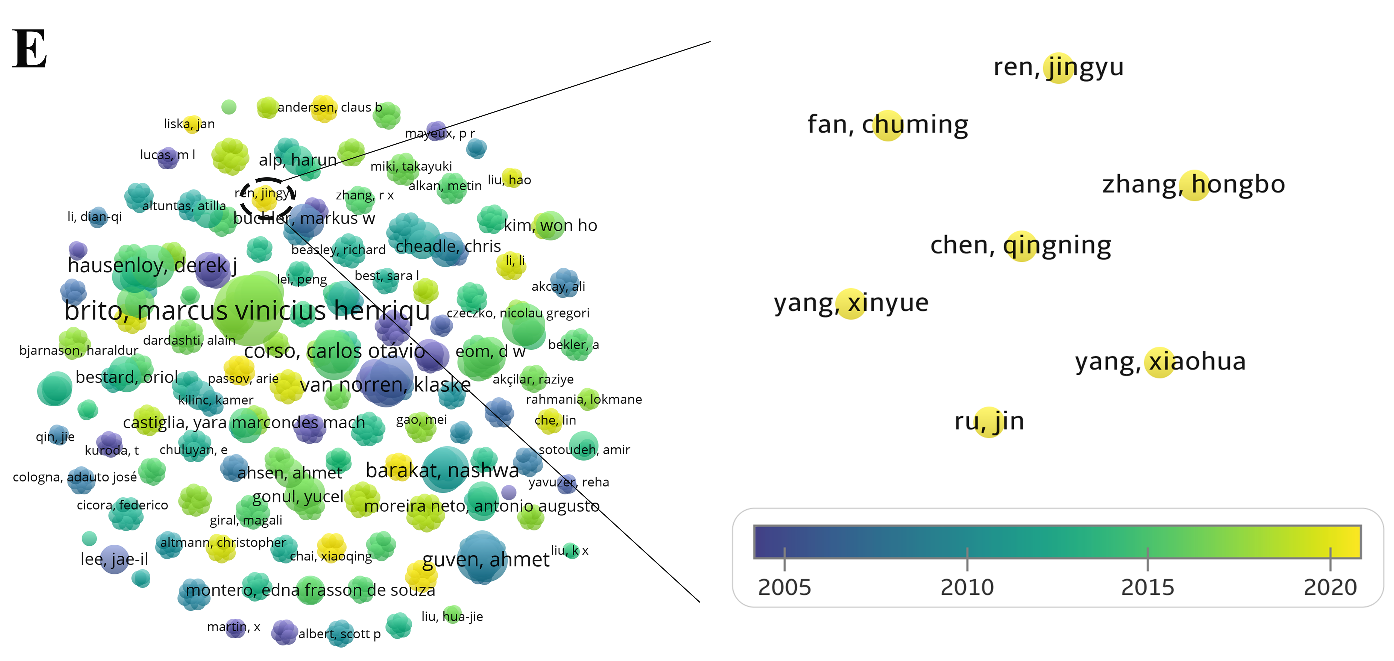


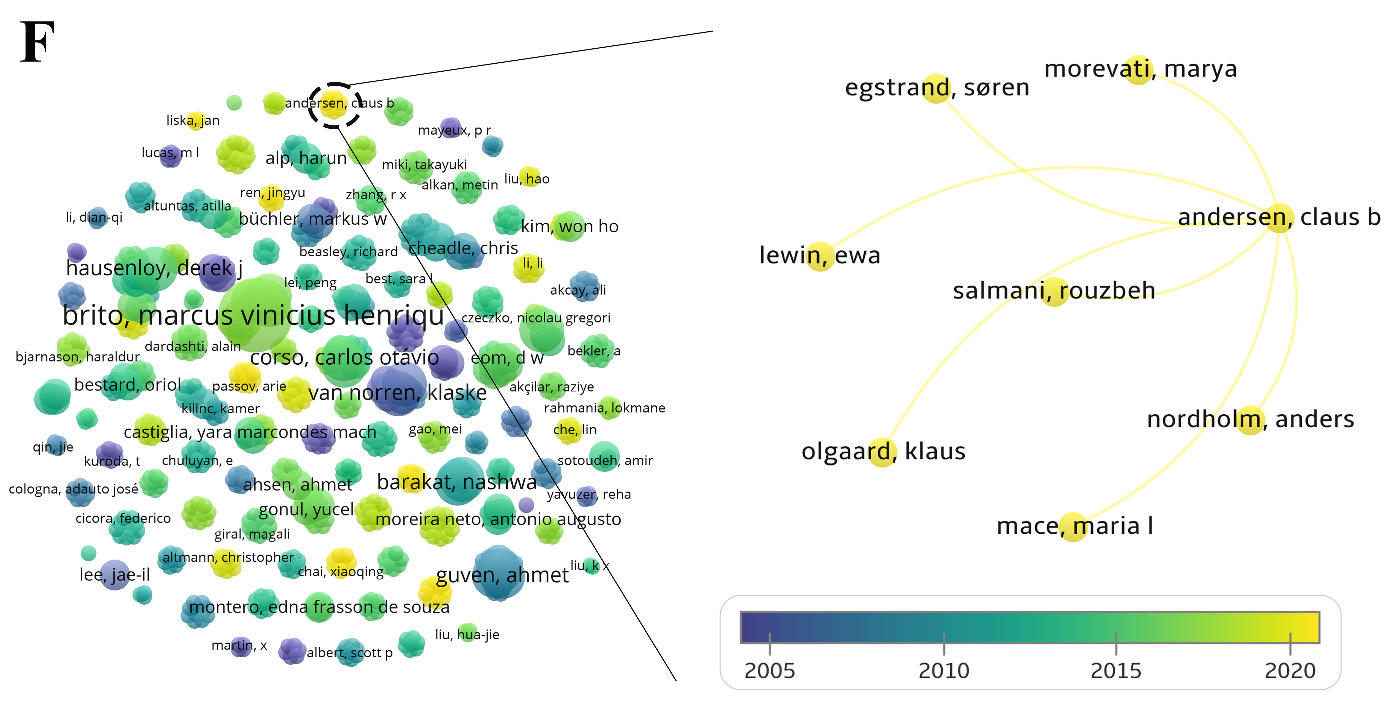


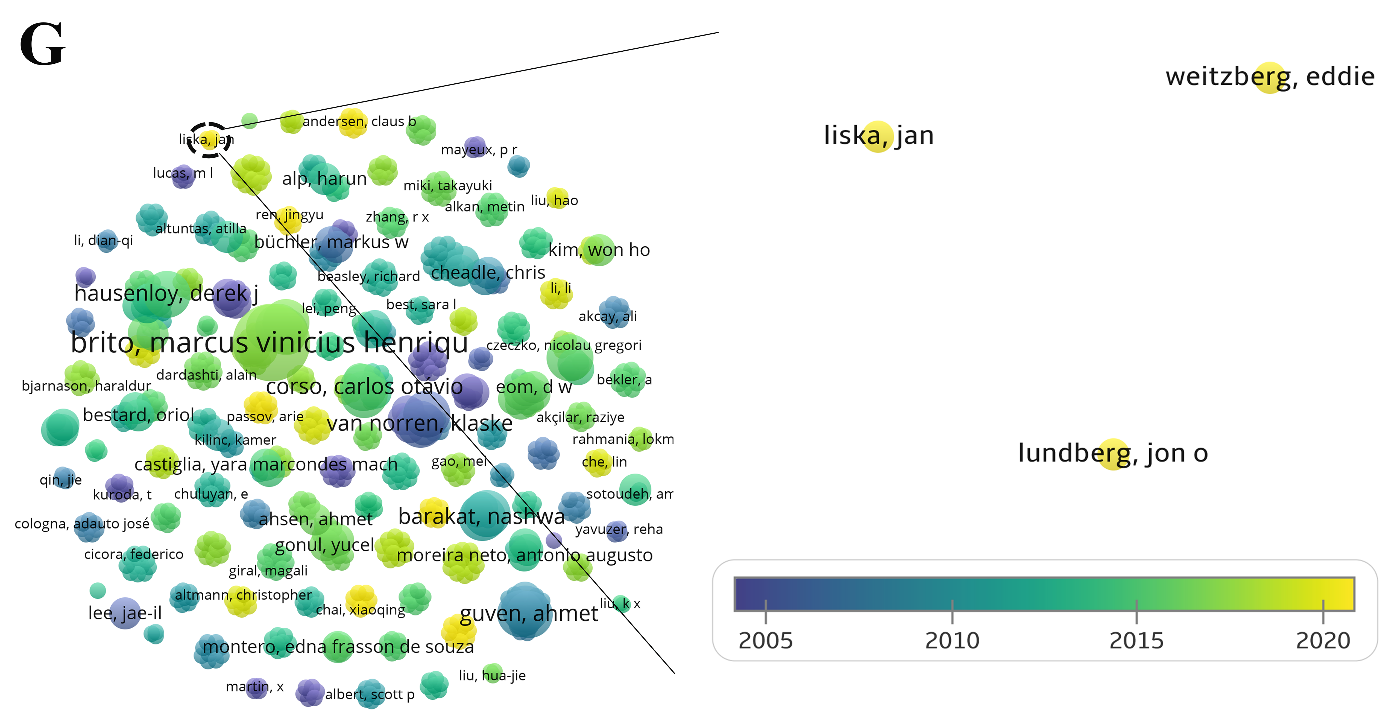


Figure S2. (A-G): newly interested authors in related fields that begin their research in mentioned scientific area.


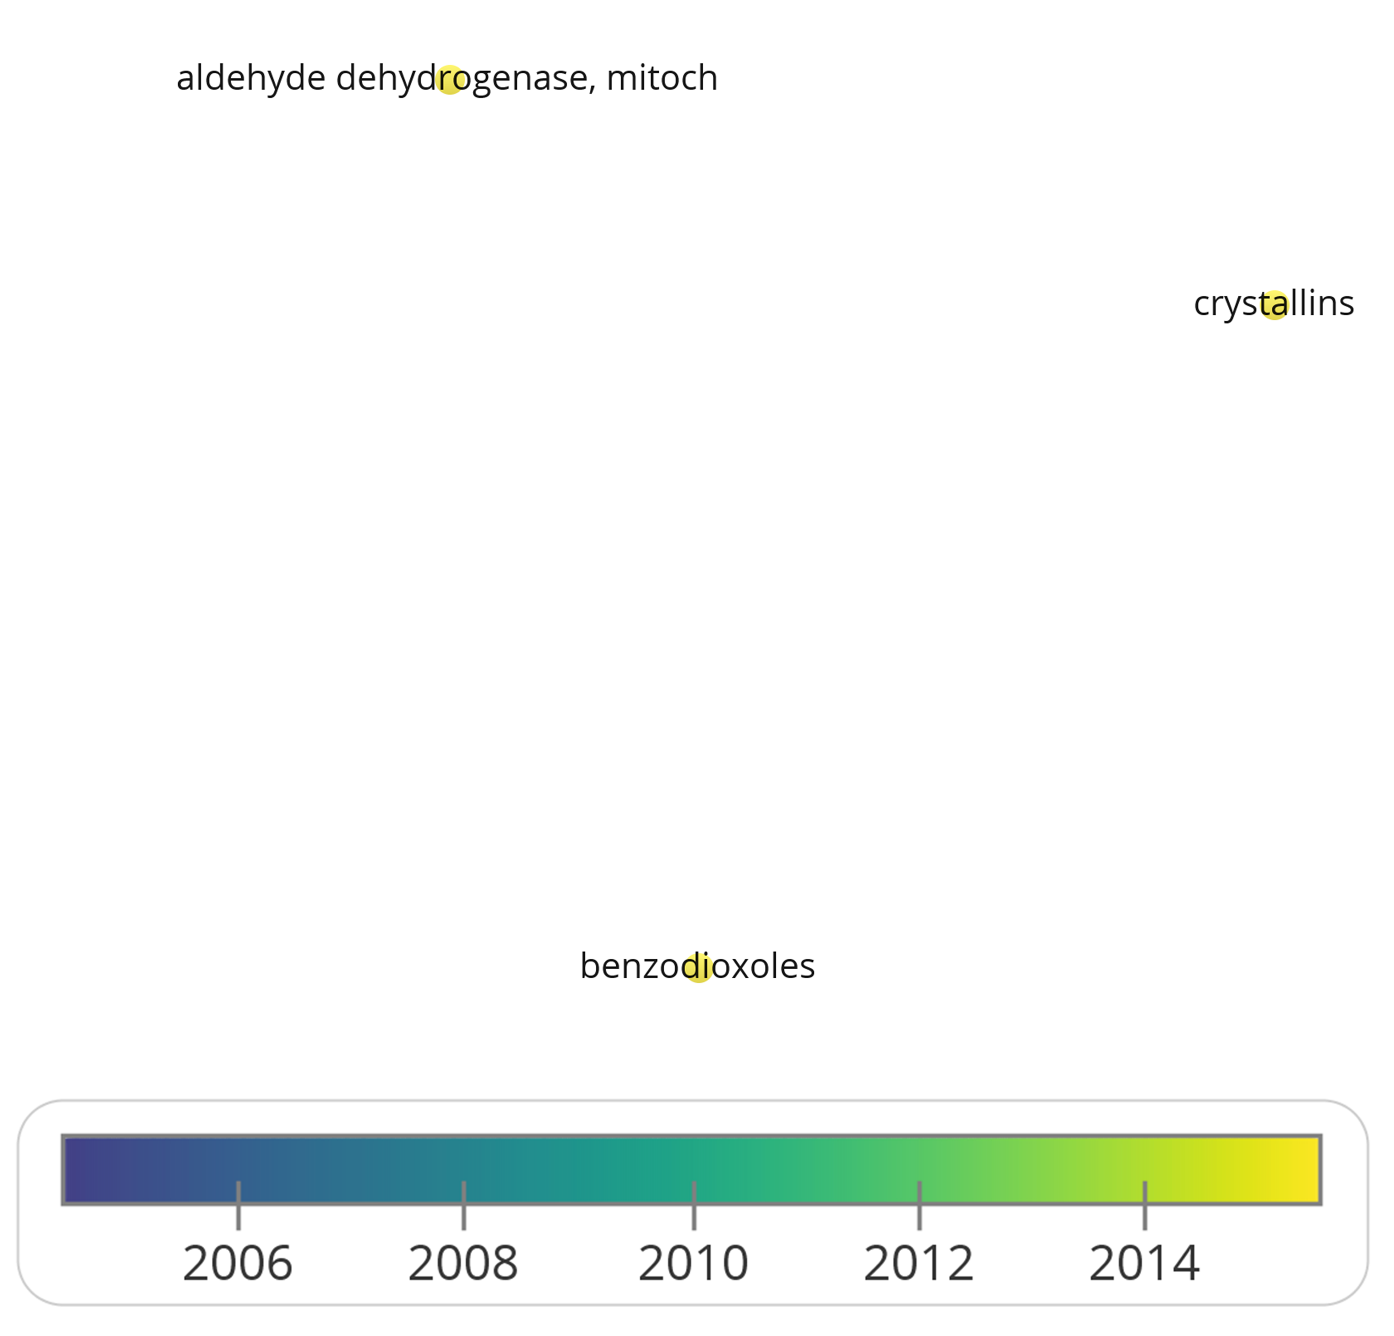


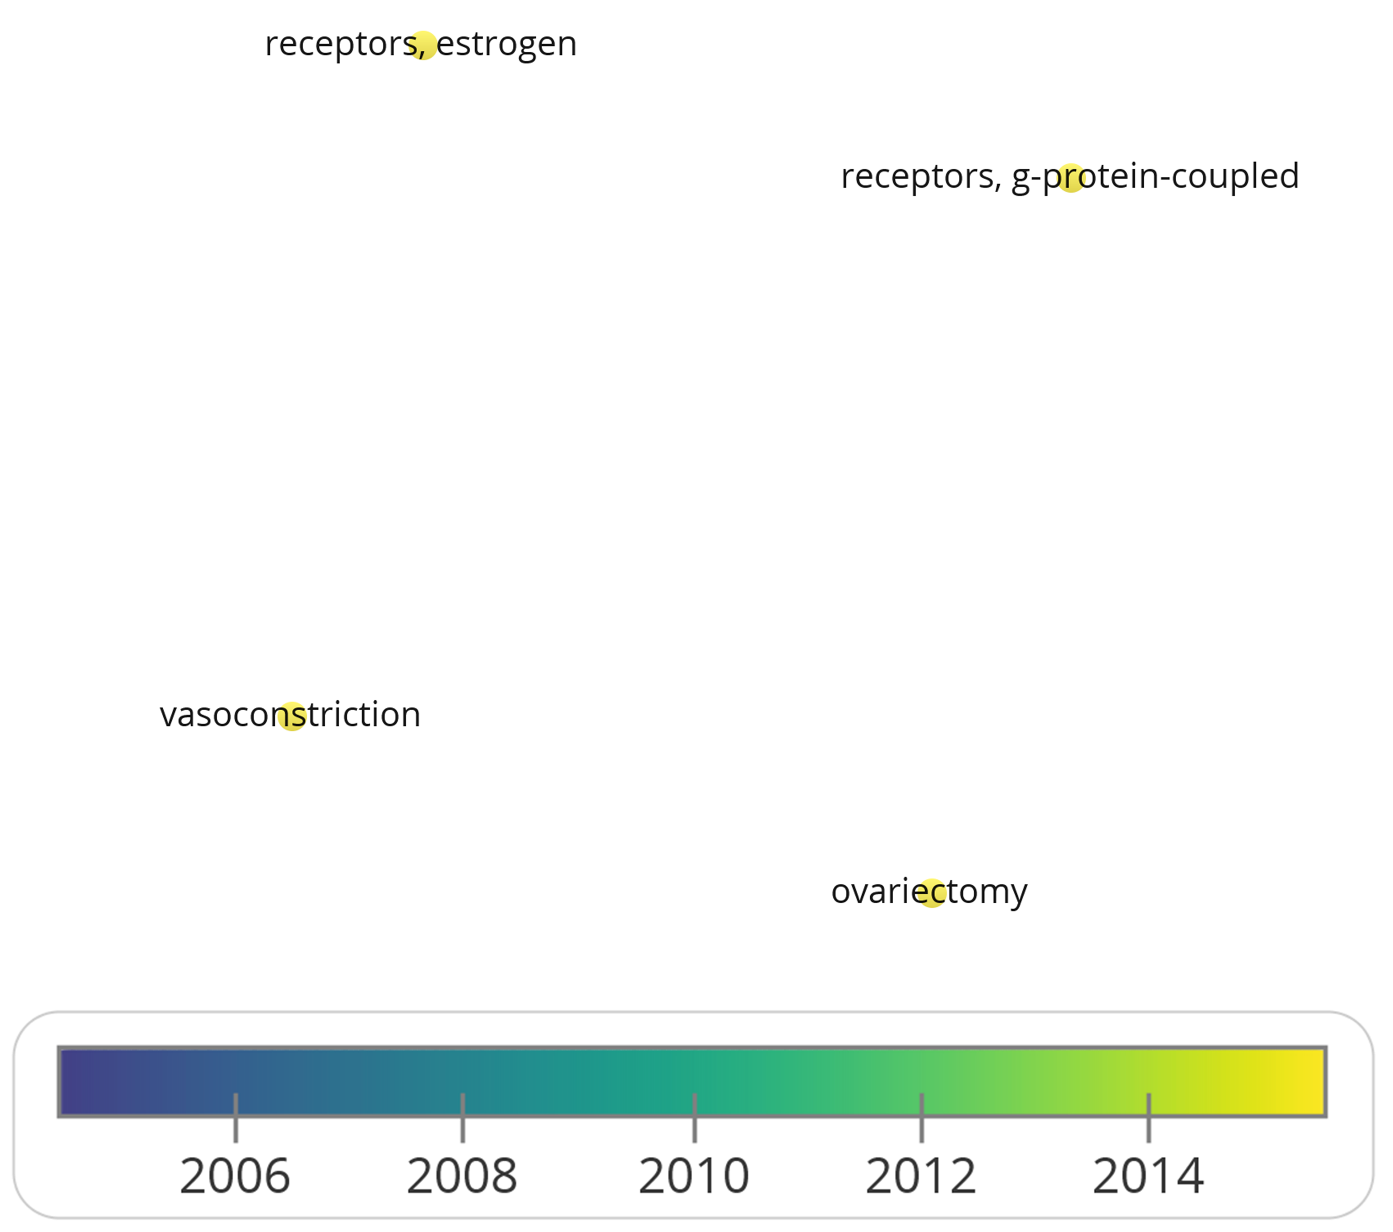


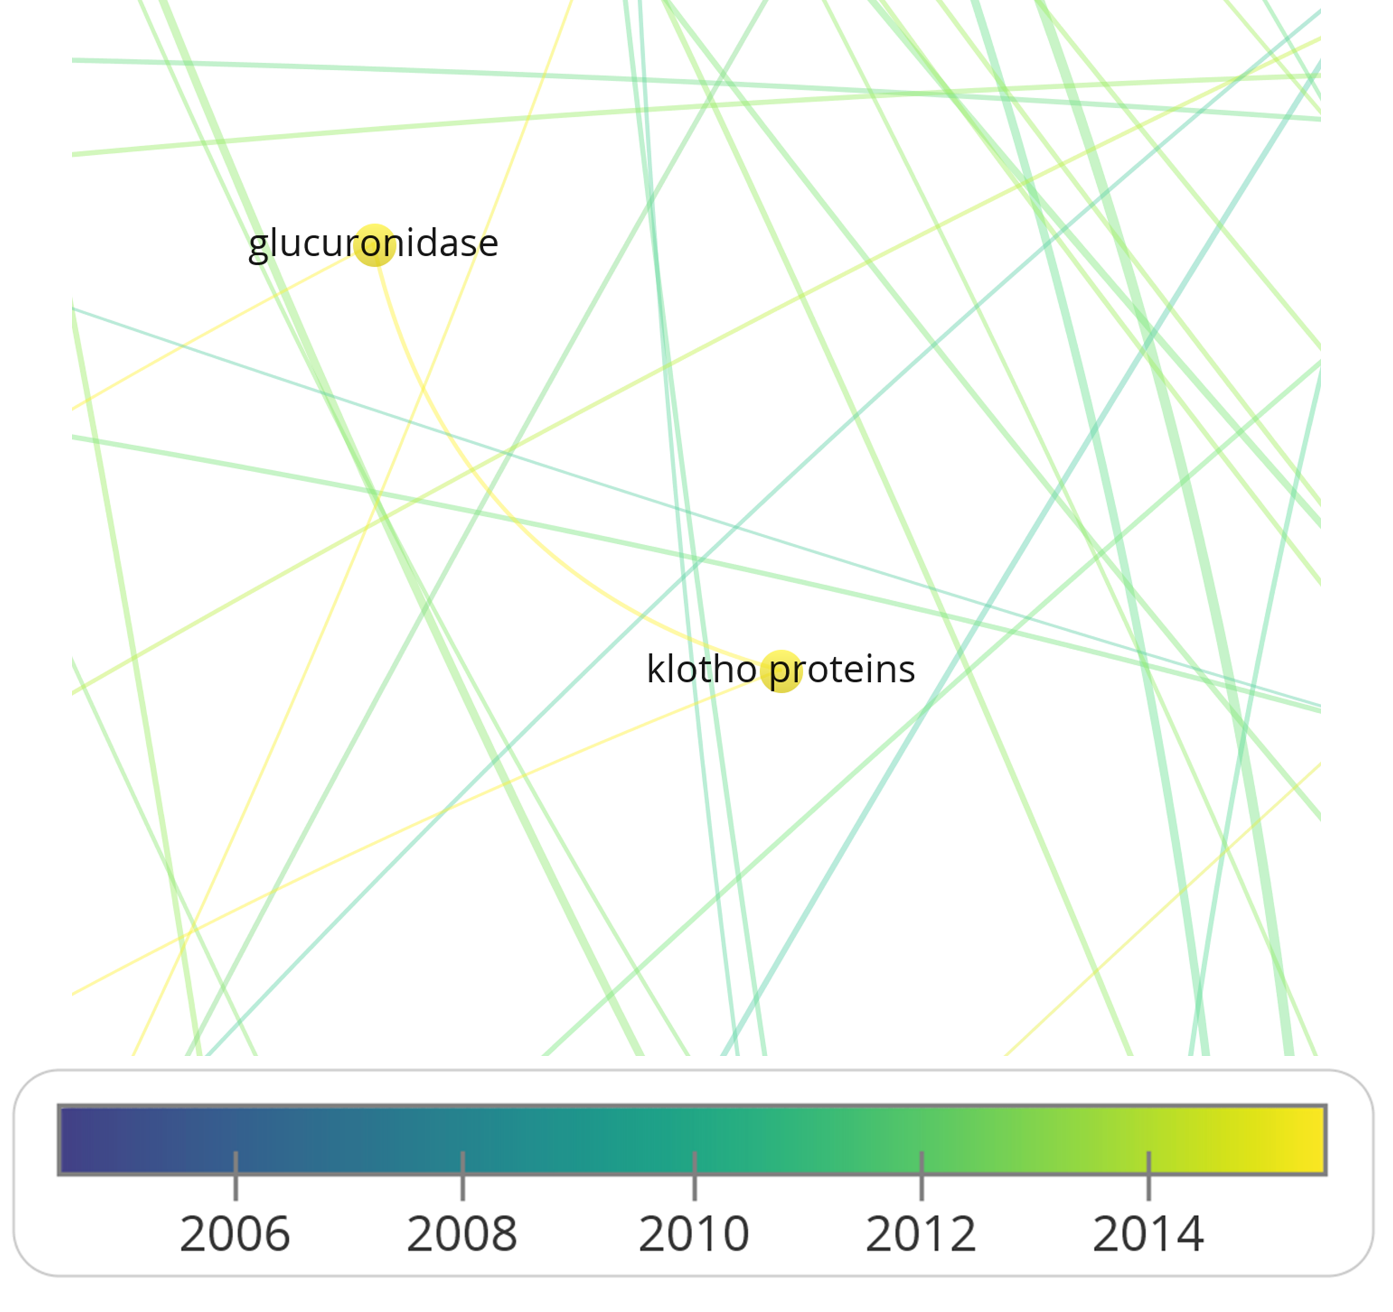


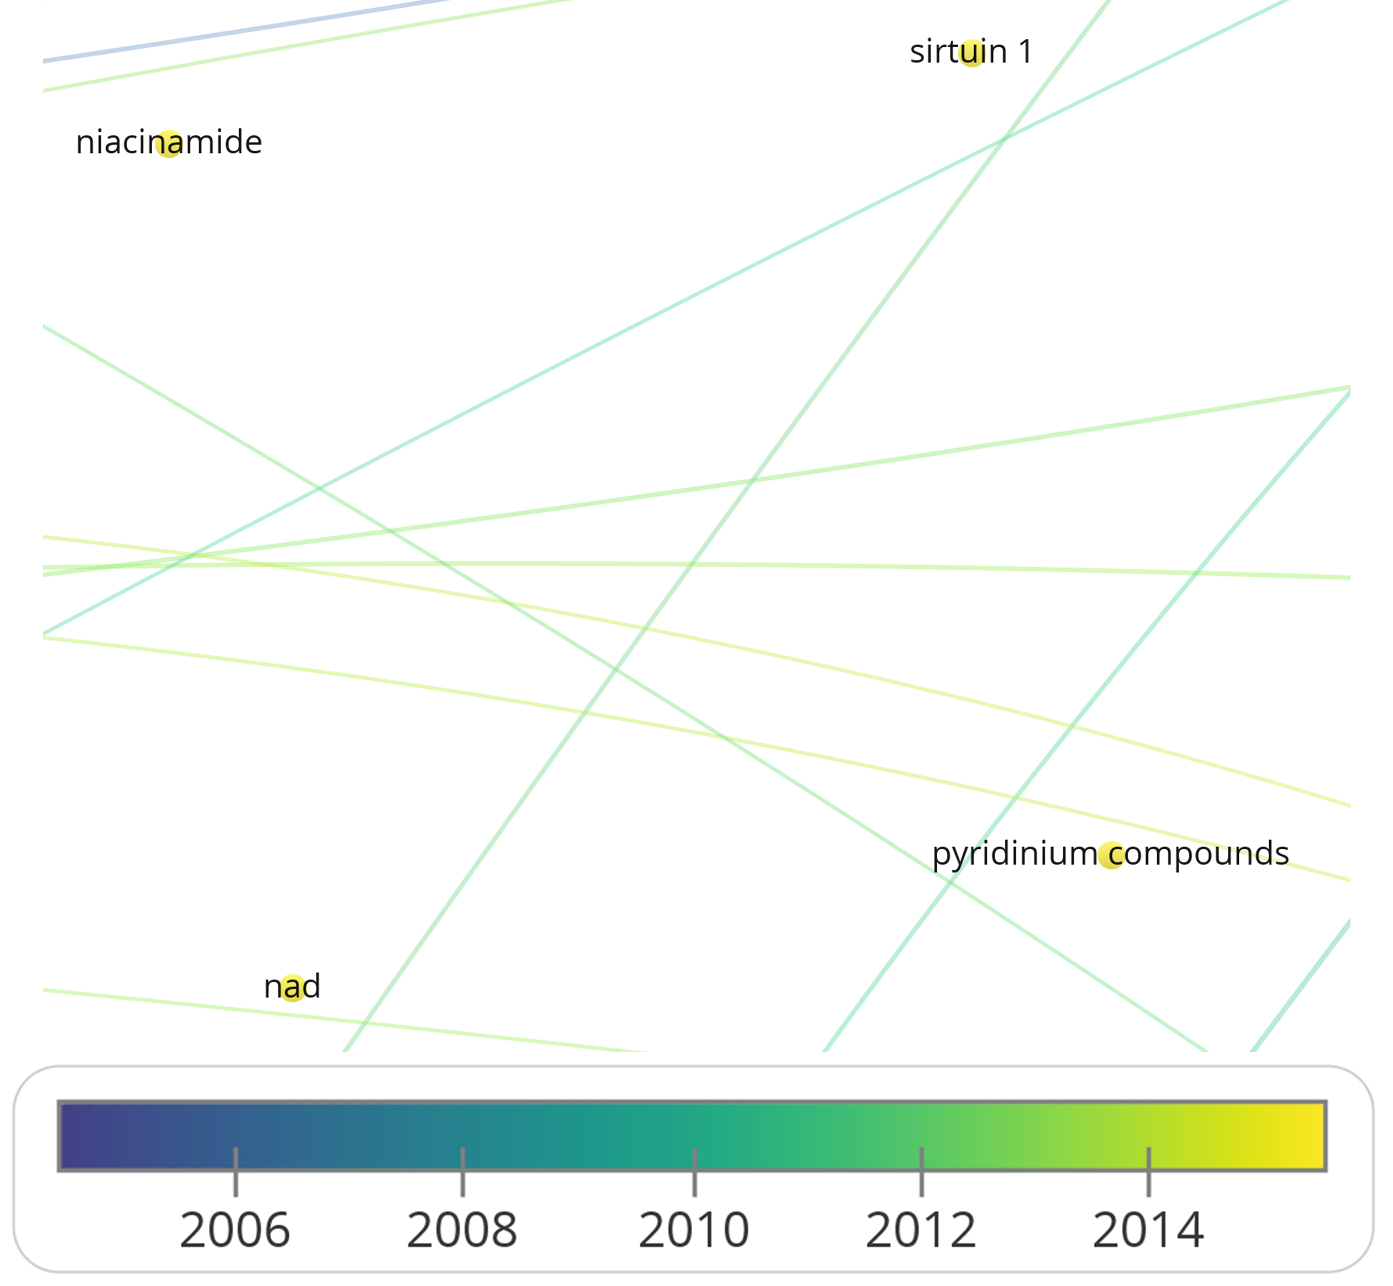


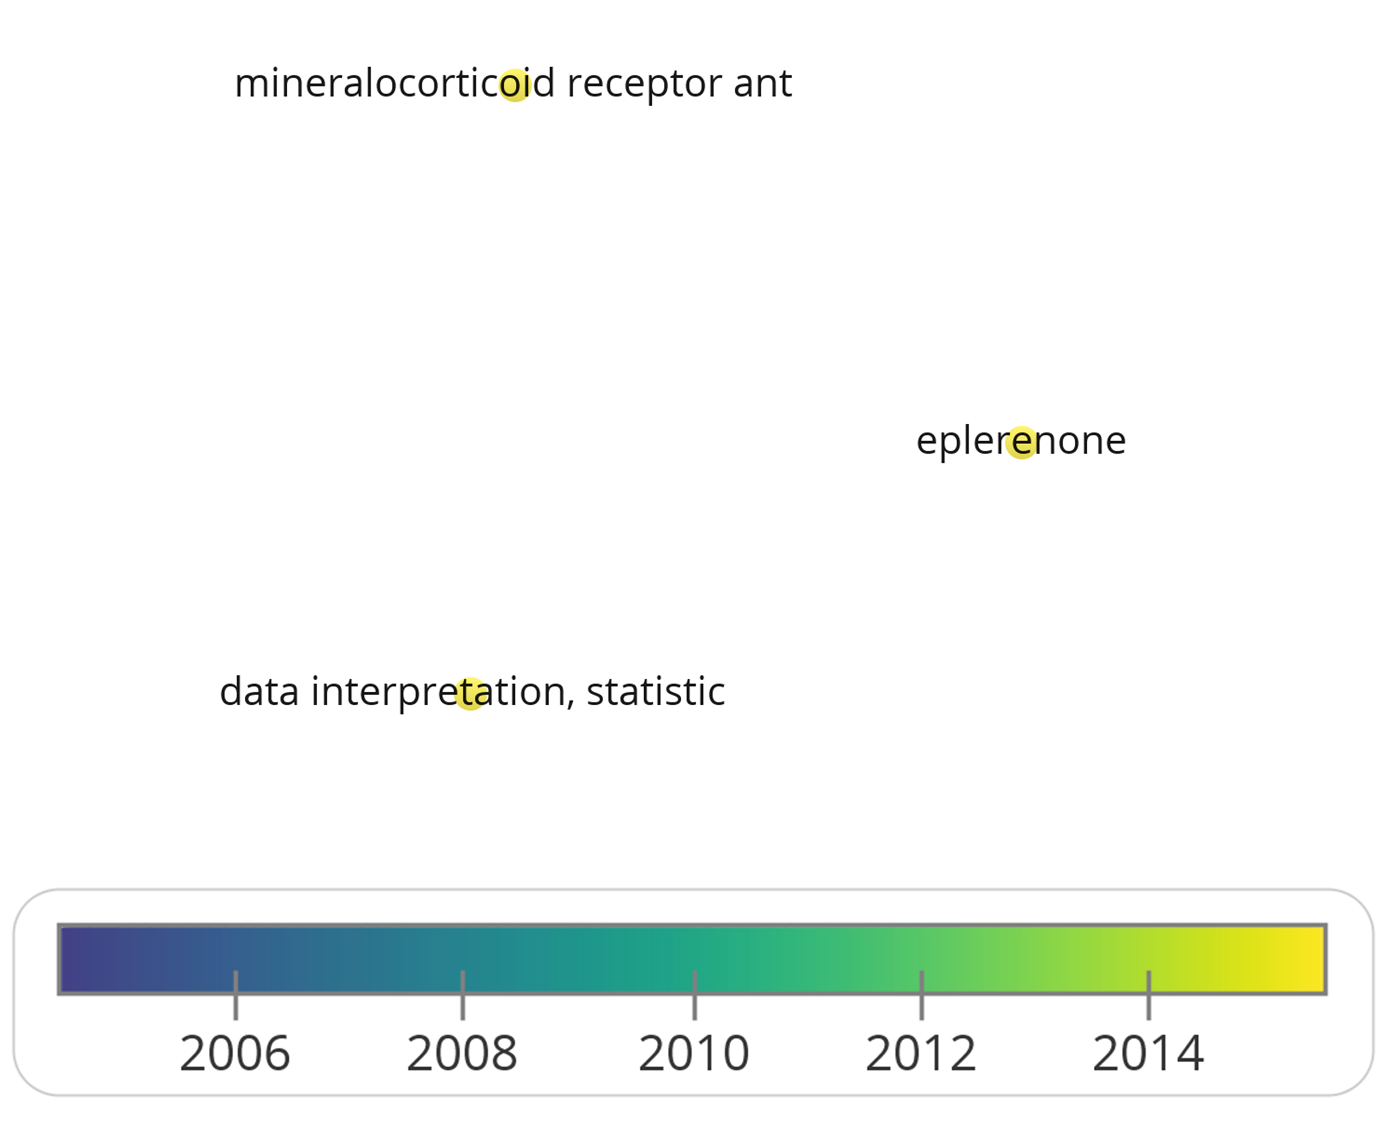


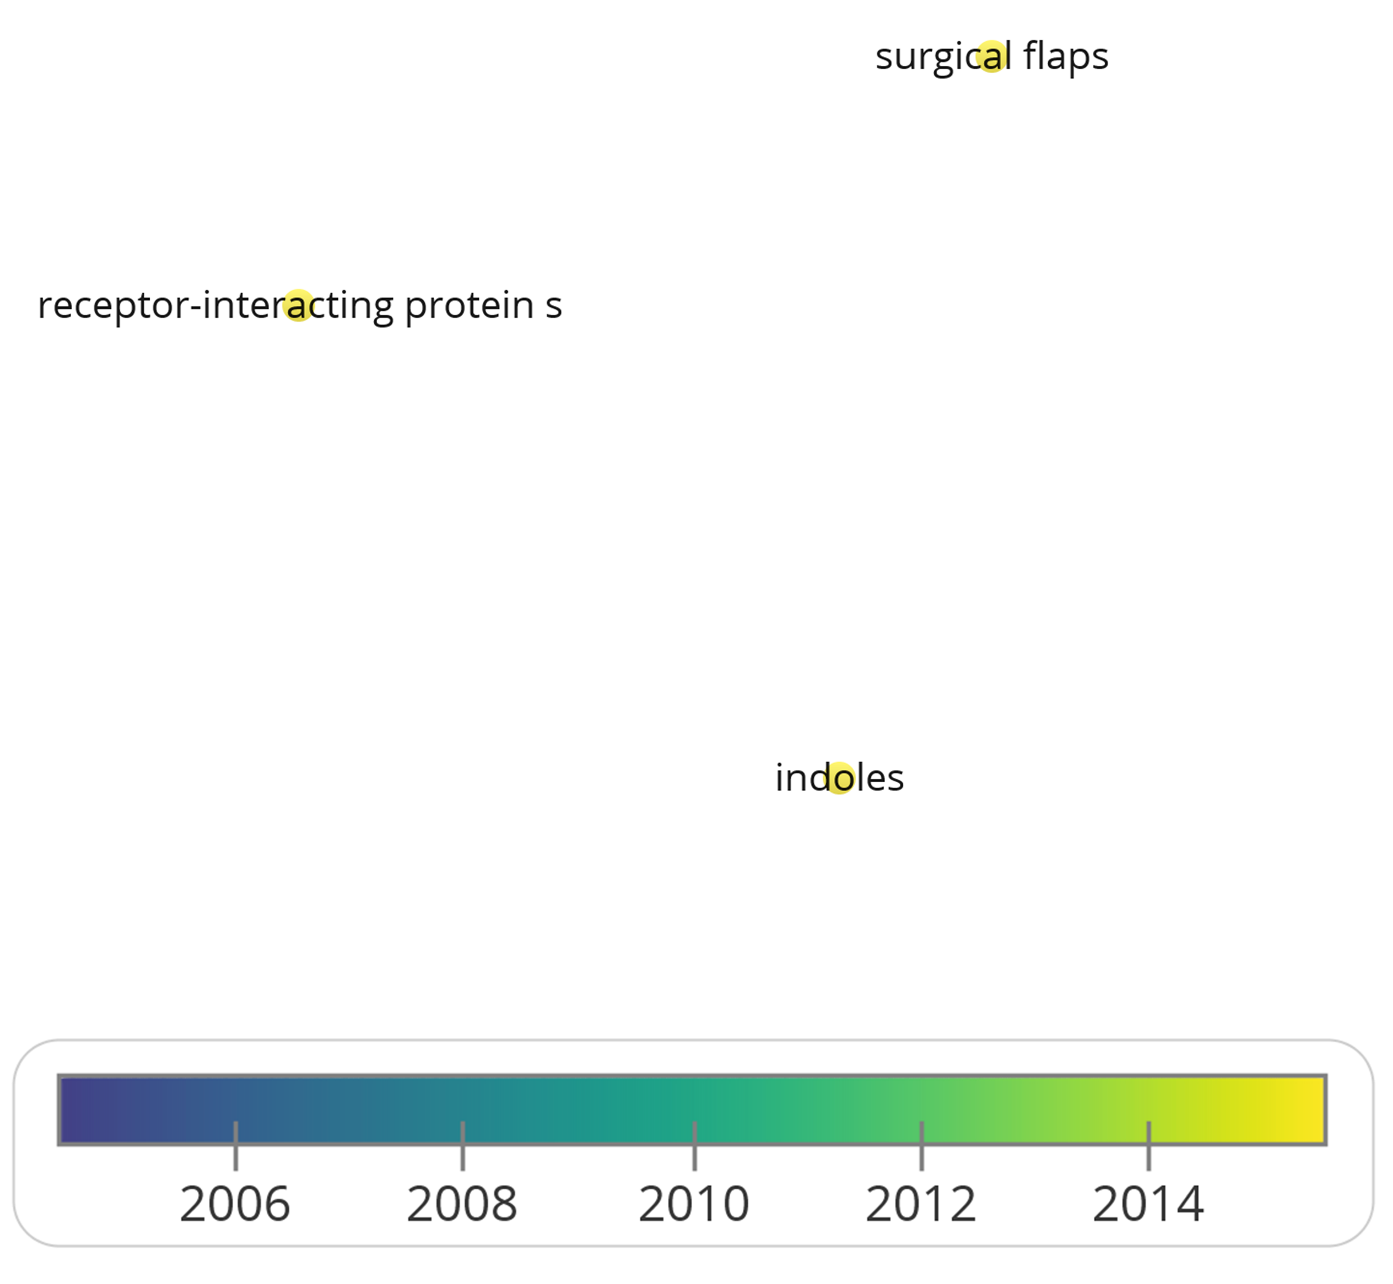


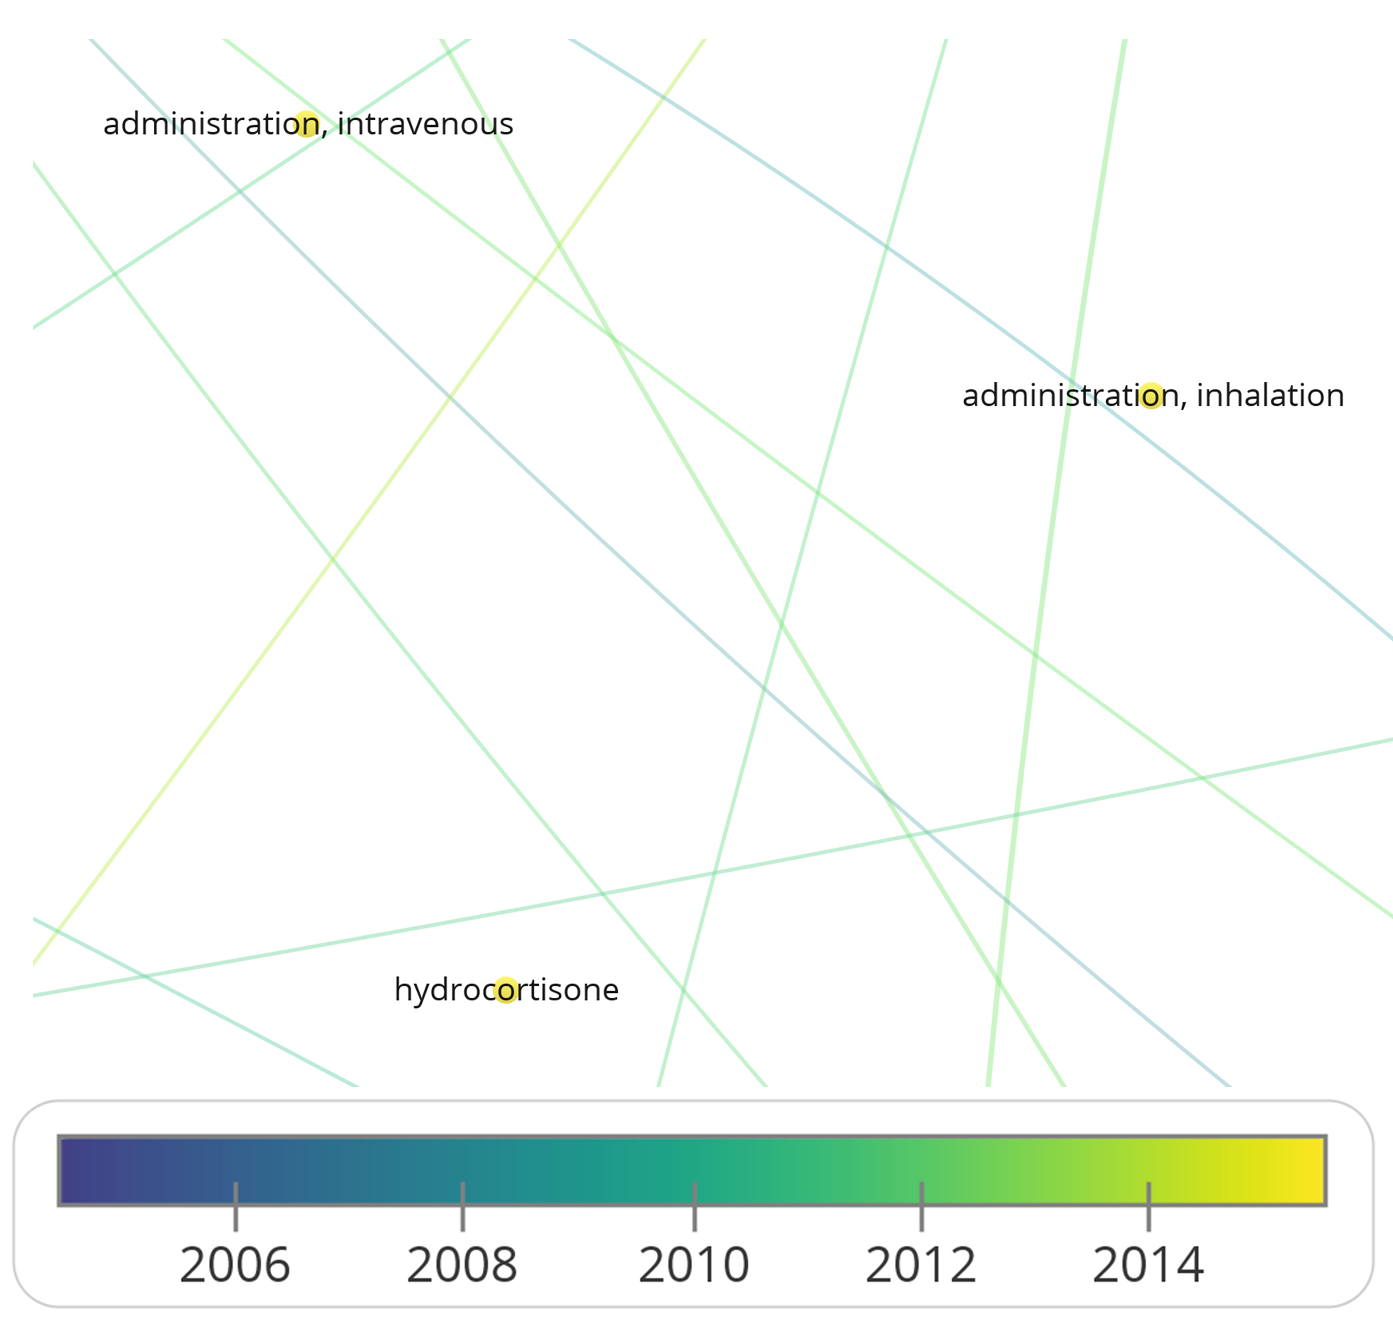


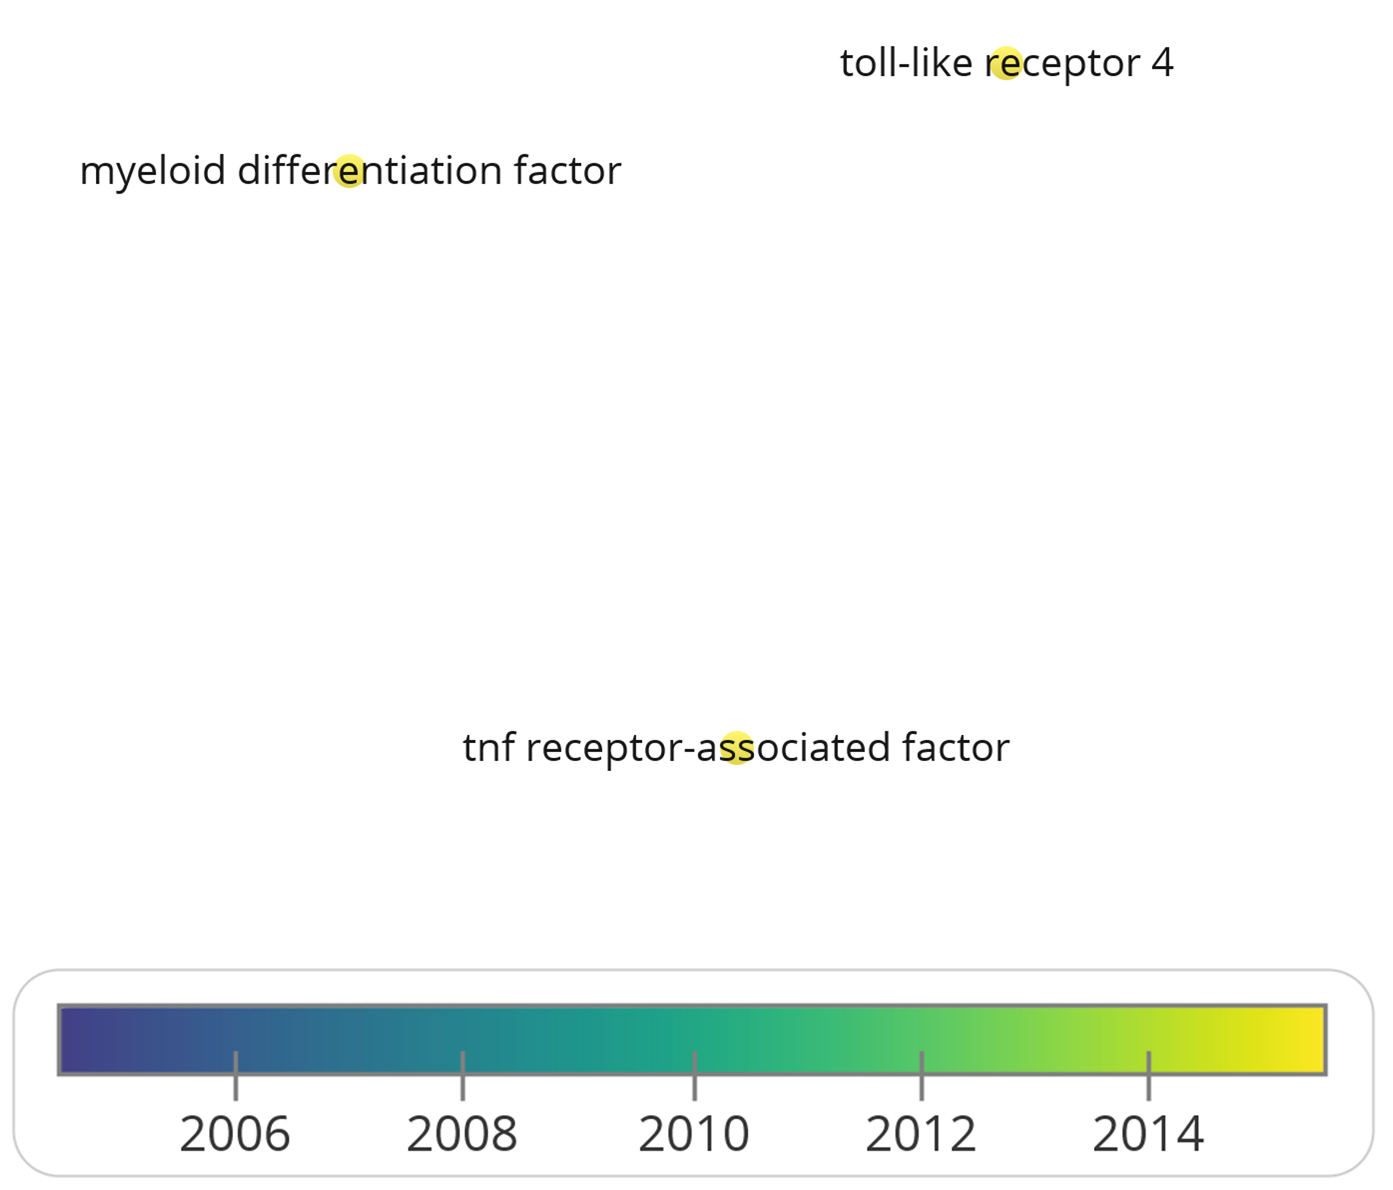


Figure S3. The result of manual search through Overlay Visualization resulted from our bibliometric analysis for finding the latest compounds, protein and receptors that are underwent studies in which their role I ischemic reperfusion injury has been studied.


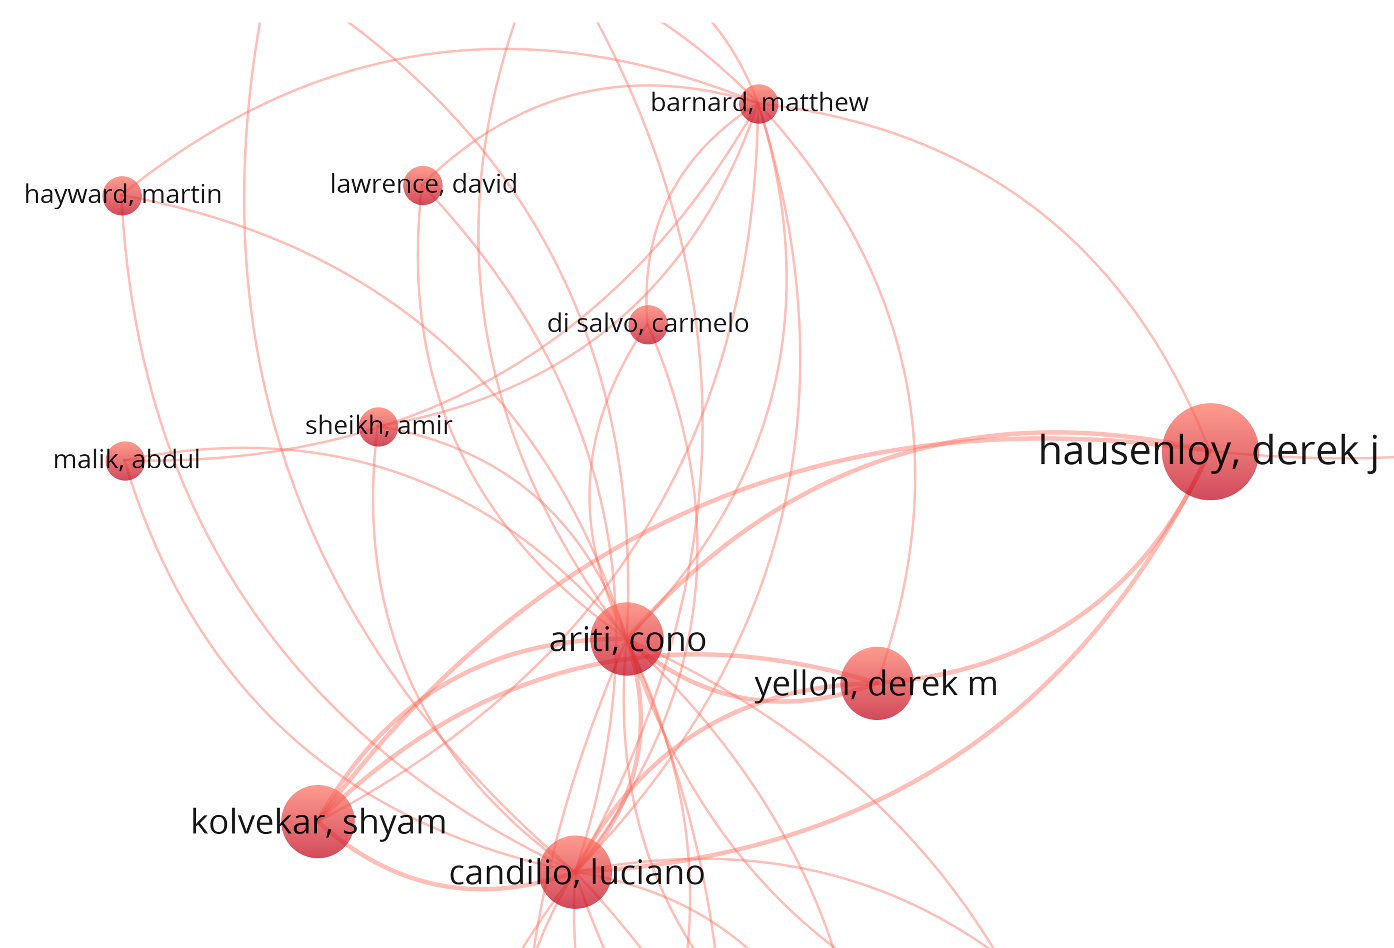


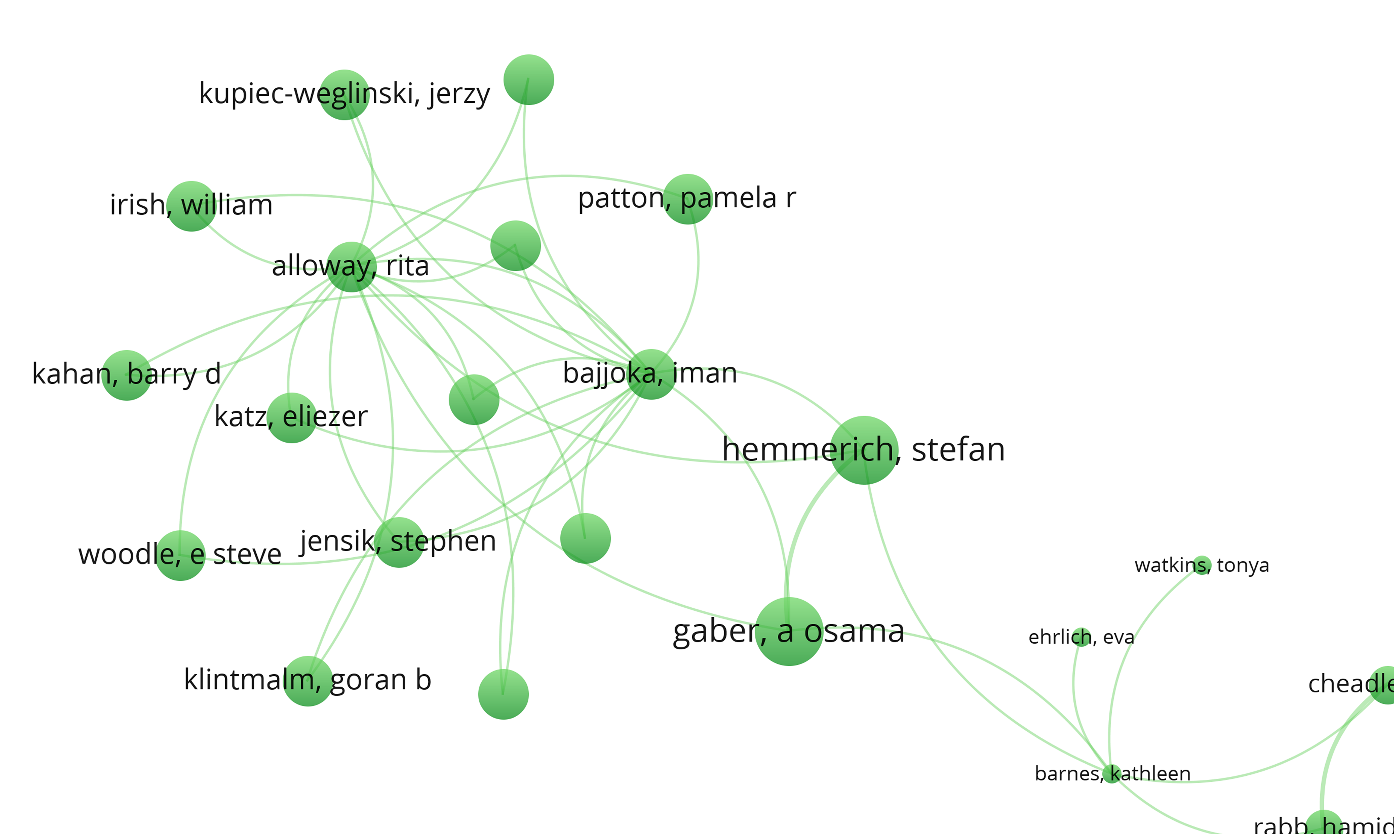


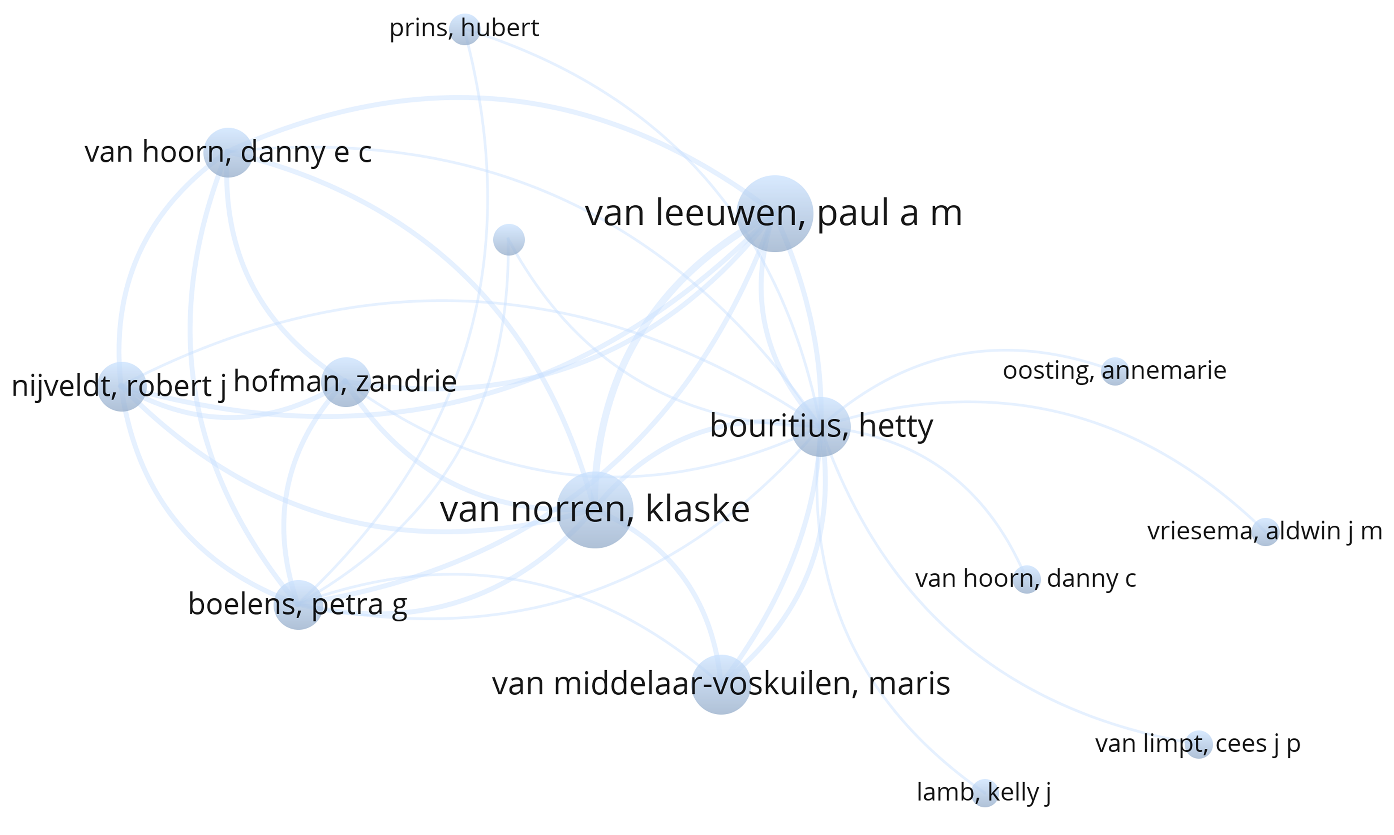


Figure S4. Network Visualization of authors with the most tendency to collaborate with other researchers in mentioned field. The size of each square of each author represents the number of link of that author.
